# Supplementary material
Source: MDPI journal article supplement (https://www.mdpi.com/2072-4292/12/15/2373)

Jan, Zonal Mean

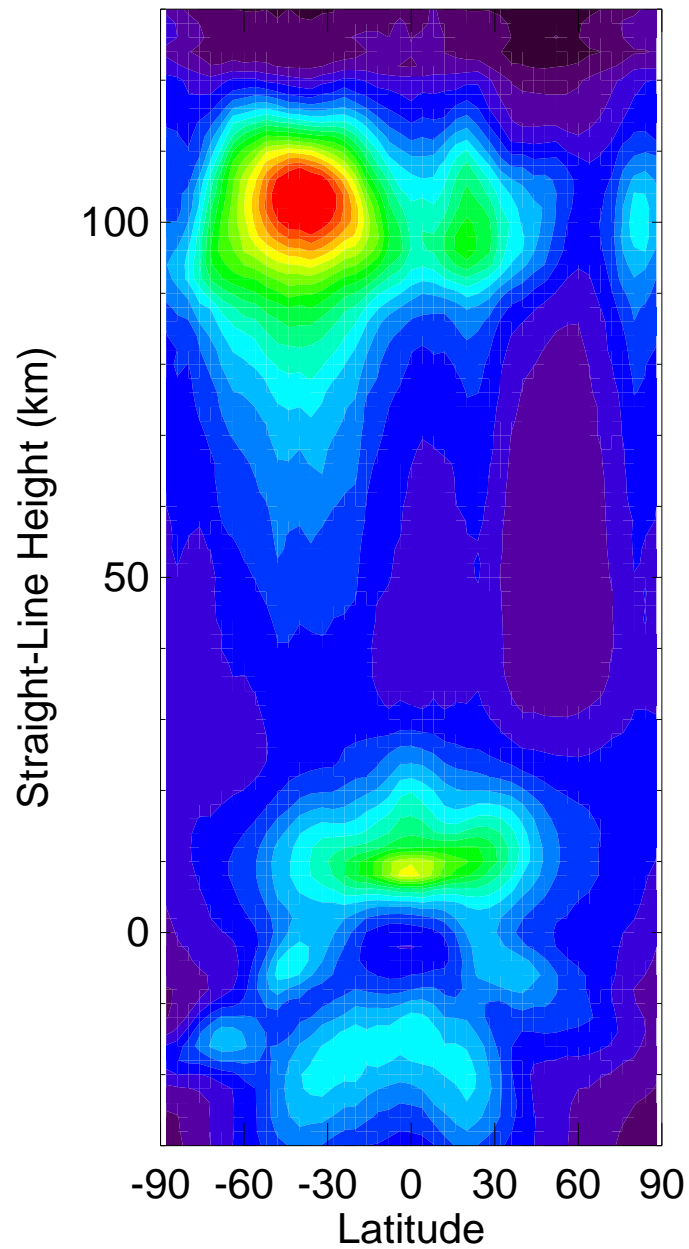

LST=23h, Lng=60W-10W

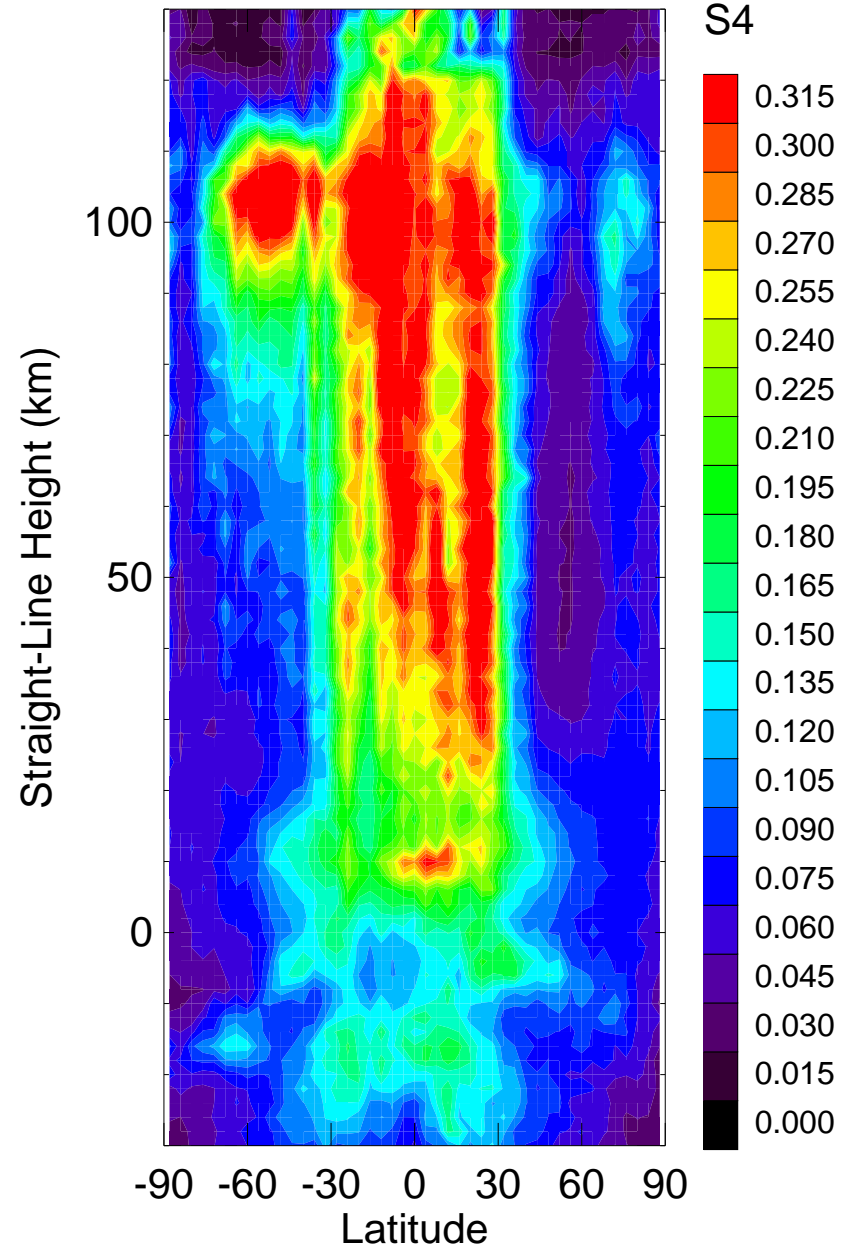

Feb, Zonal Mean

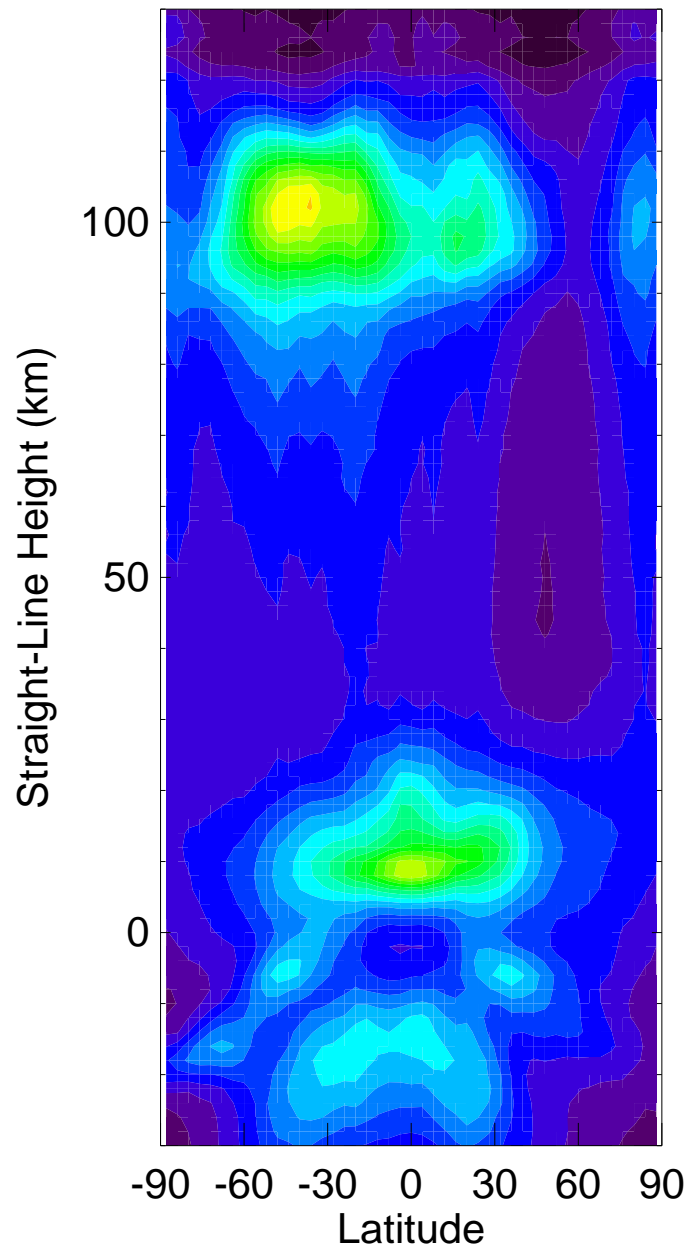

LST=23h, Lng=60W-10W

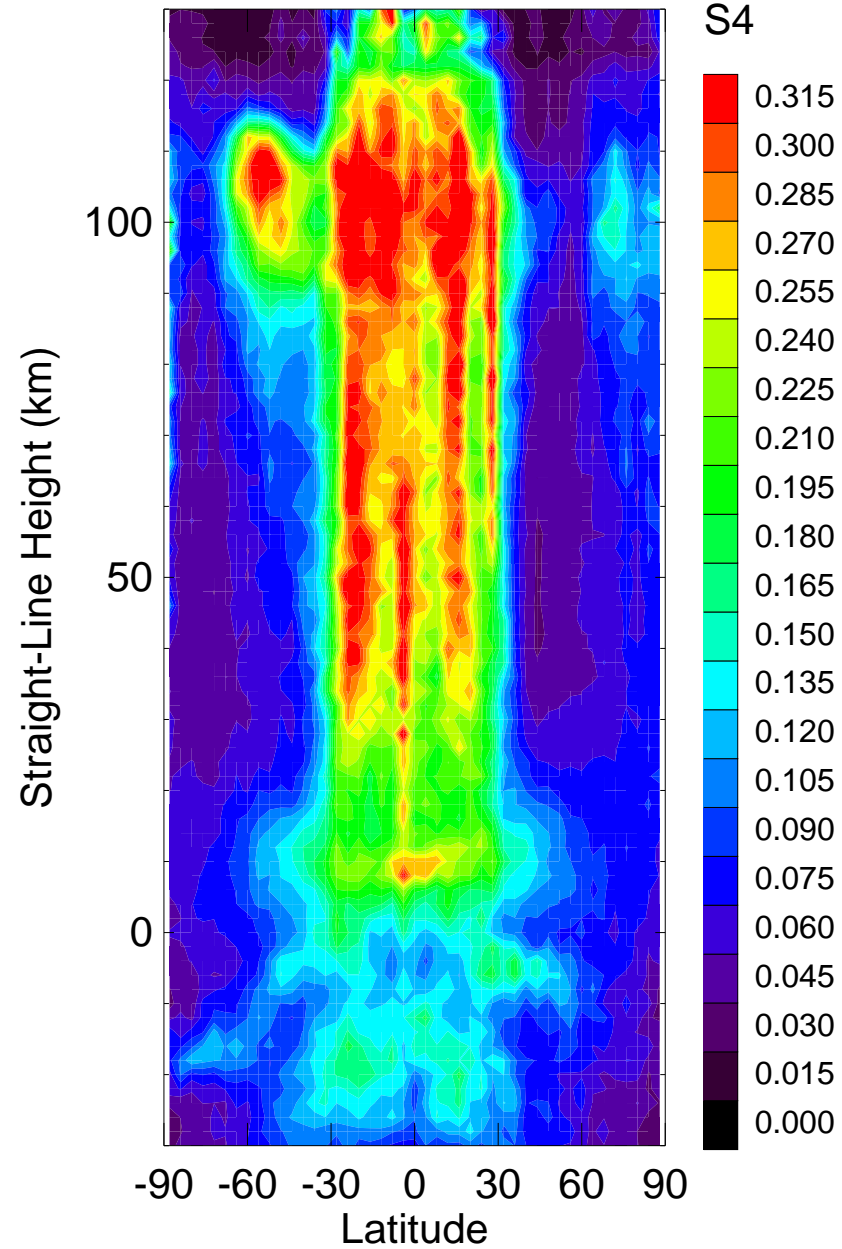

Mar, Zonal Mean

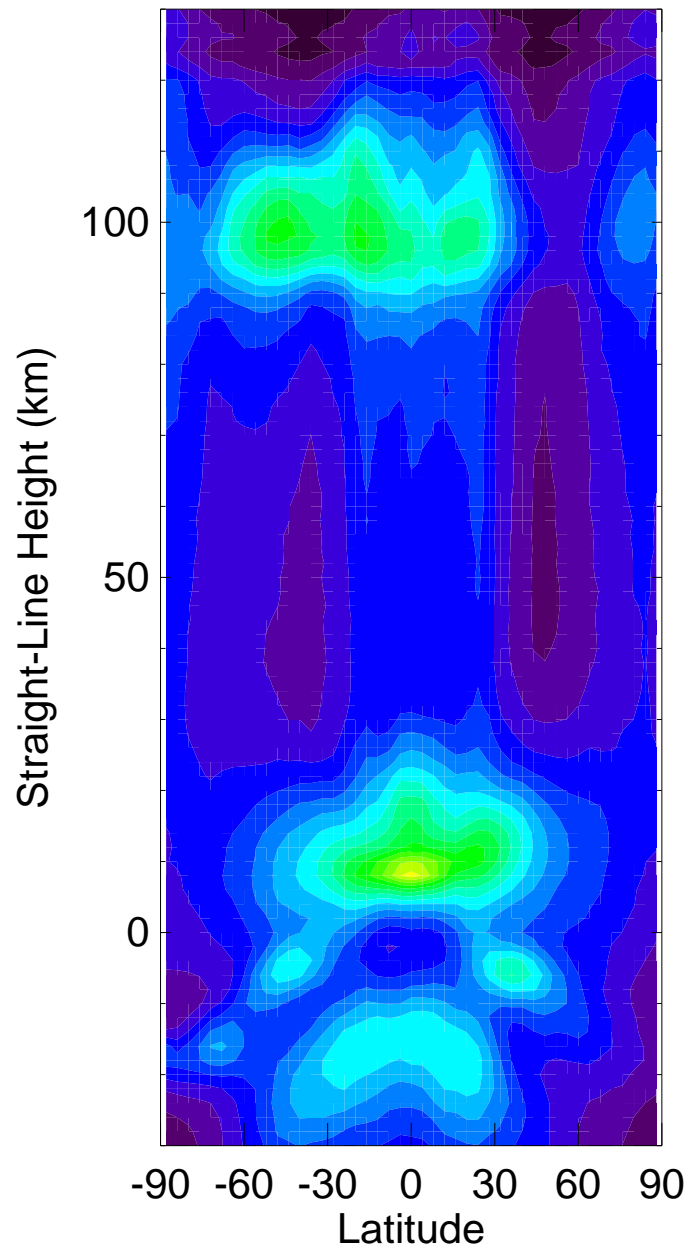

LST=23h, Lng=60W-10W

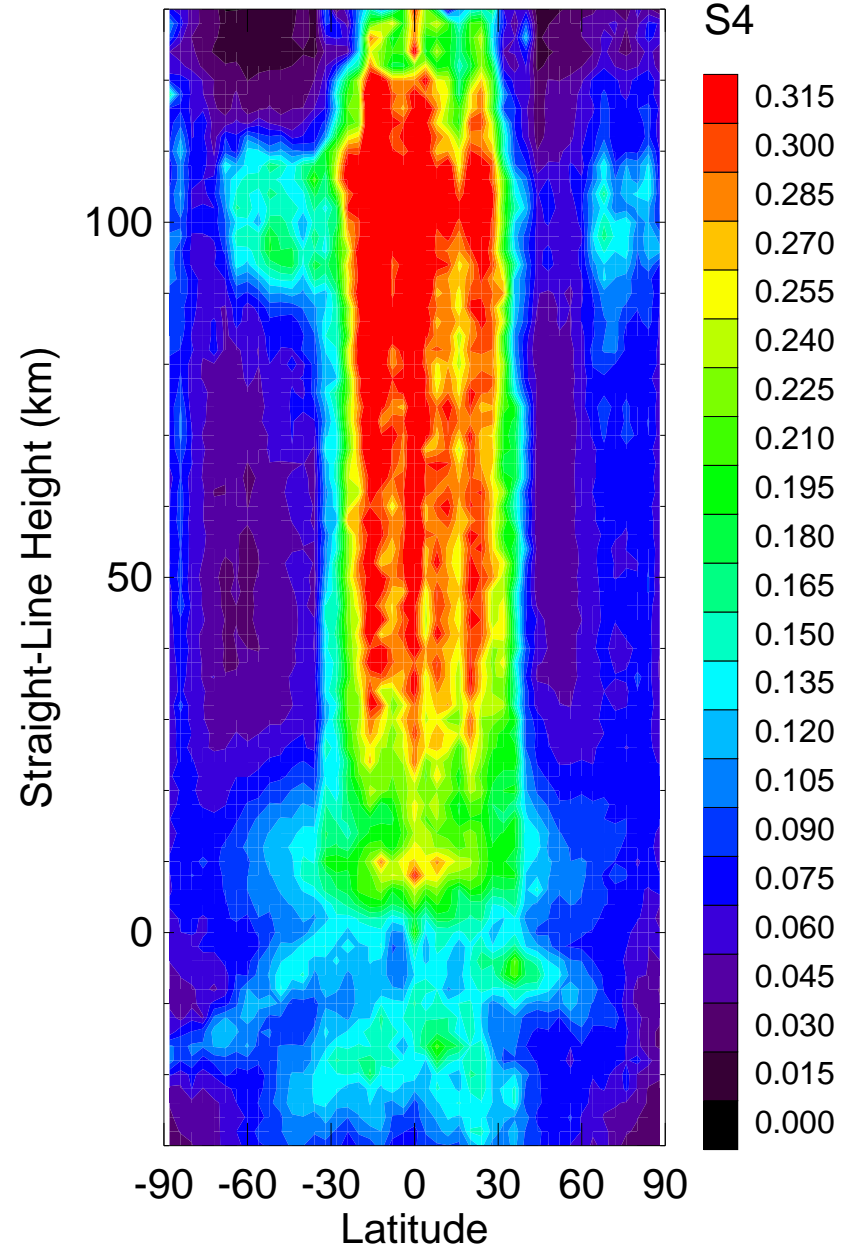

Apr, Zonal Mean

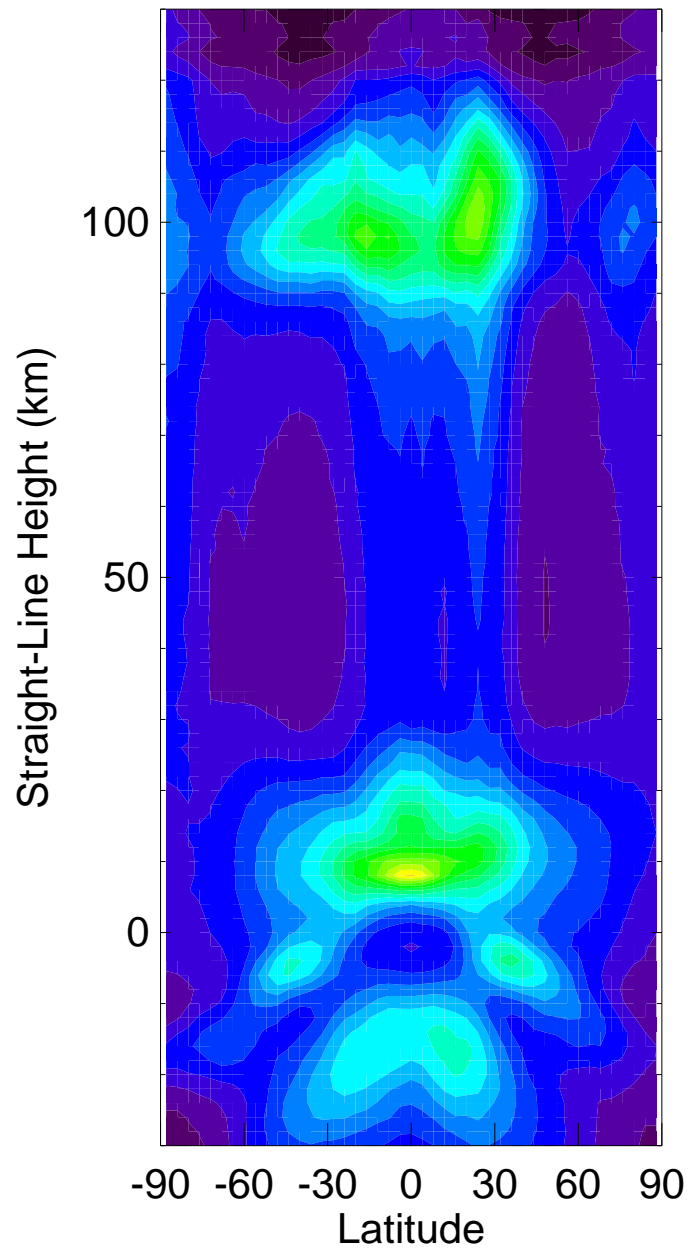

LST=23h, Lng=60W-10W

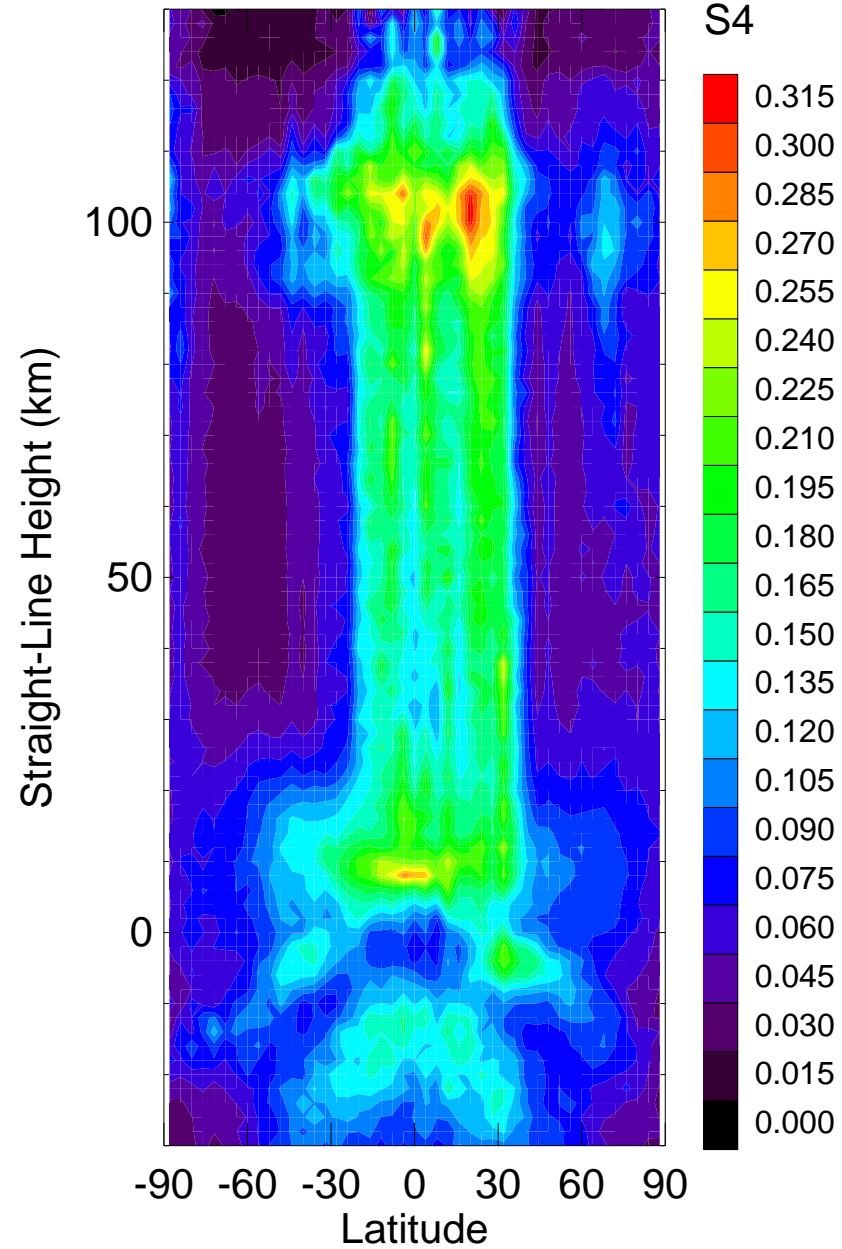

May, Zonal Mean

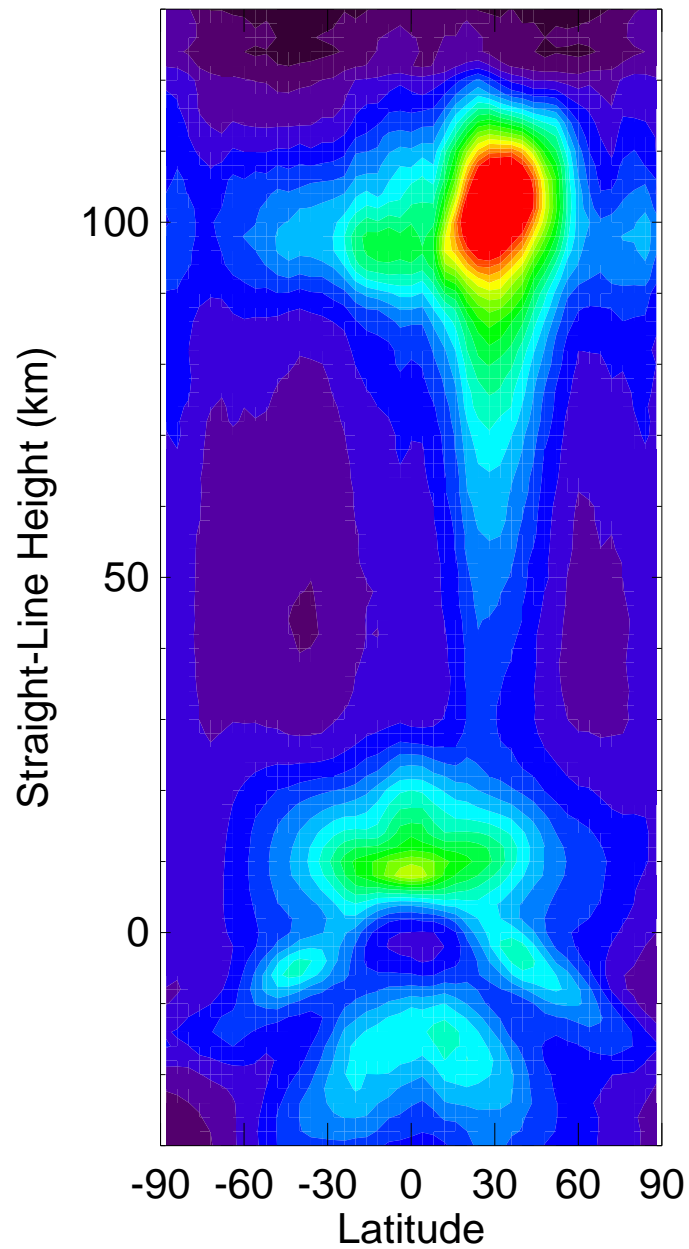

LST=23h, Lng=60W-10W

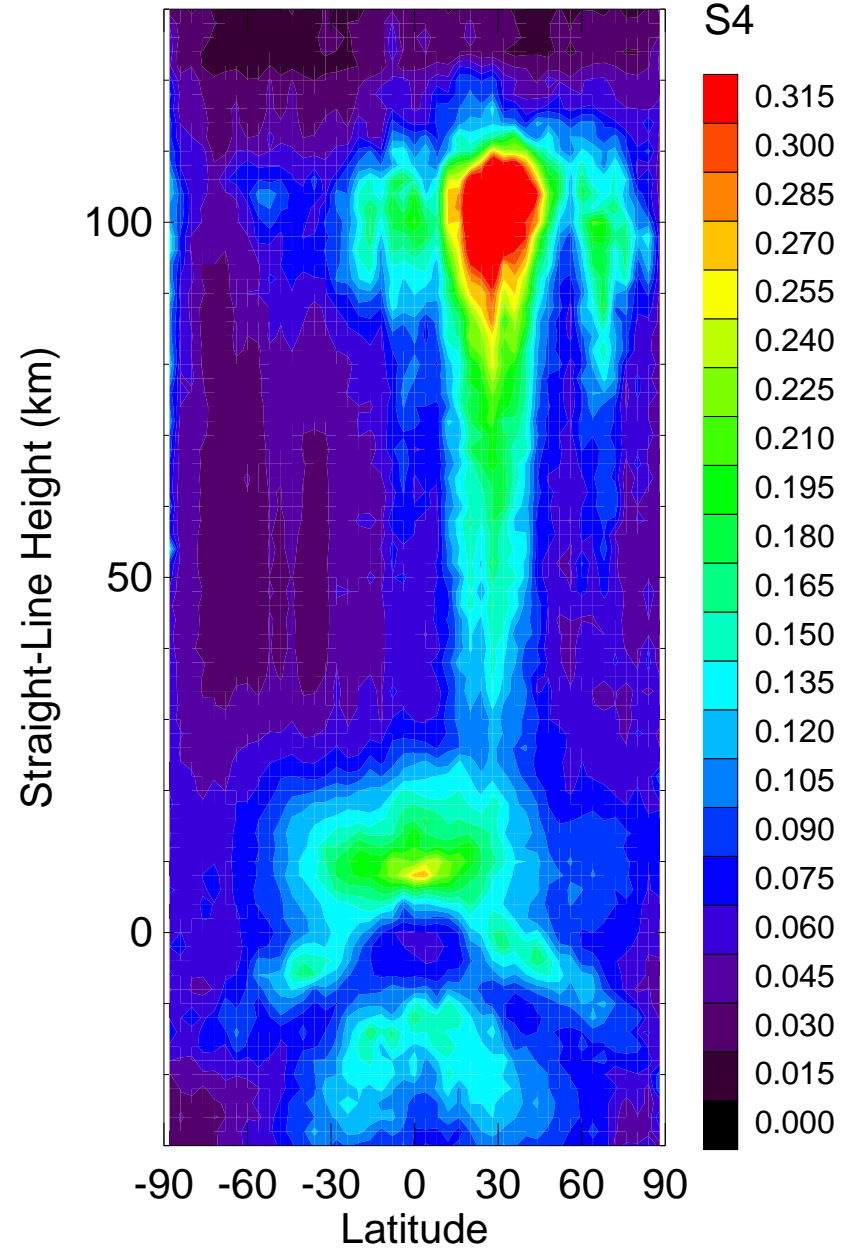

Jun, Zonal Mean

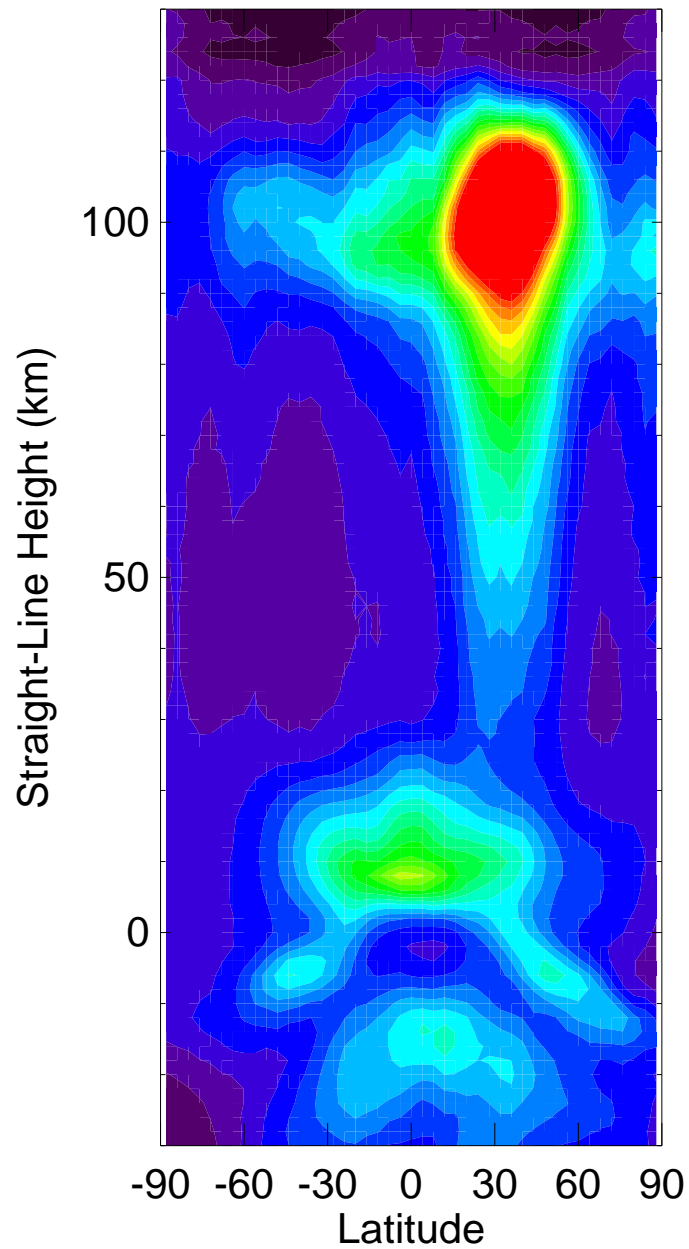

LST=23h, Lng=60W-10W

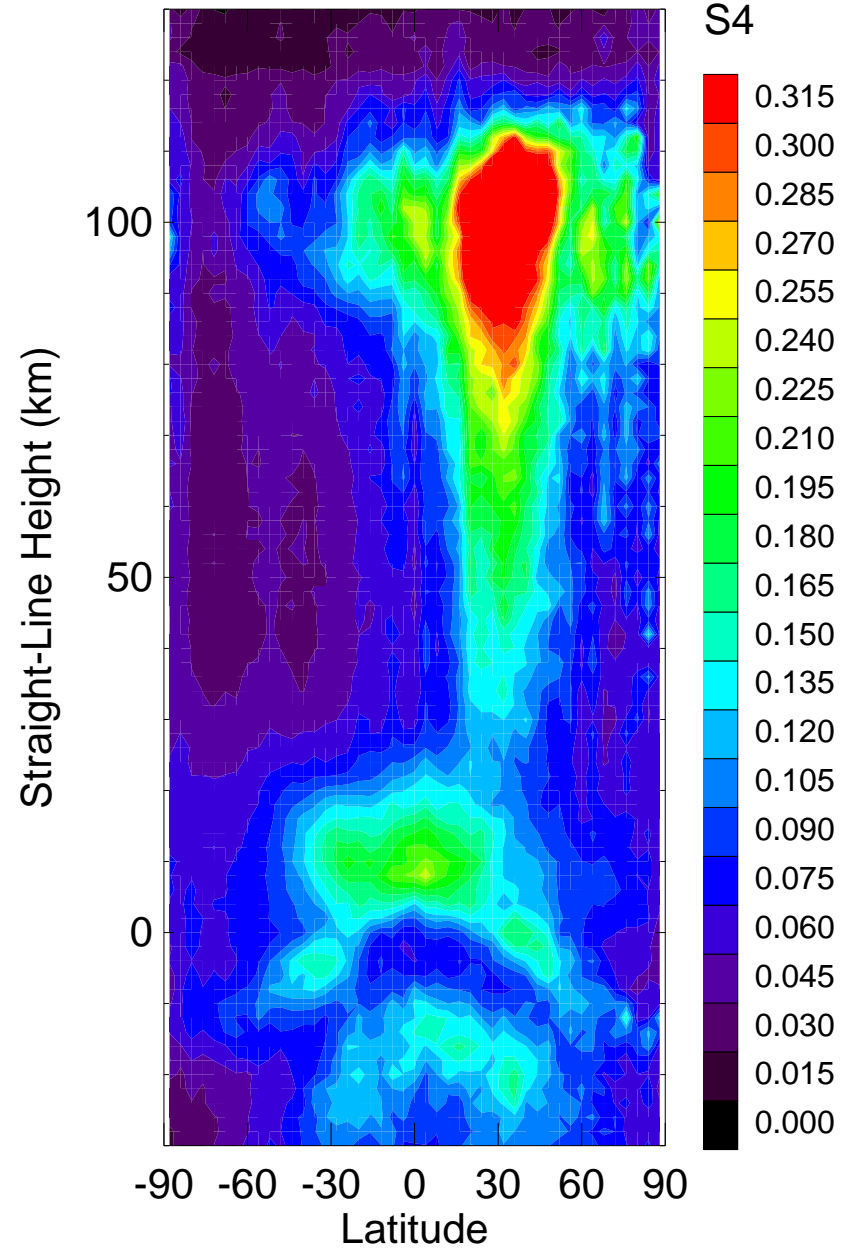



Jul, Zonal Mean

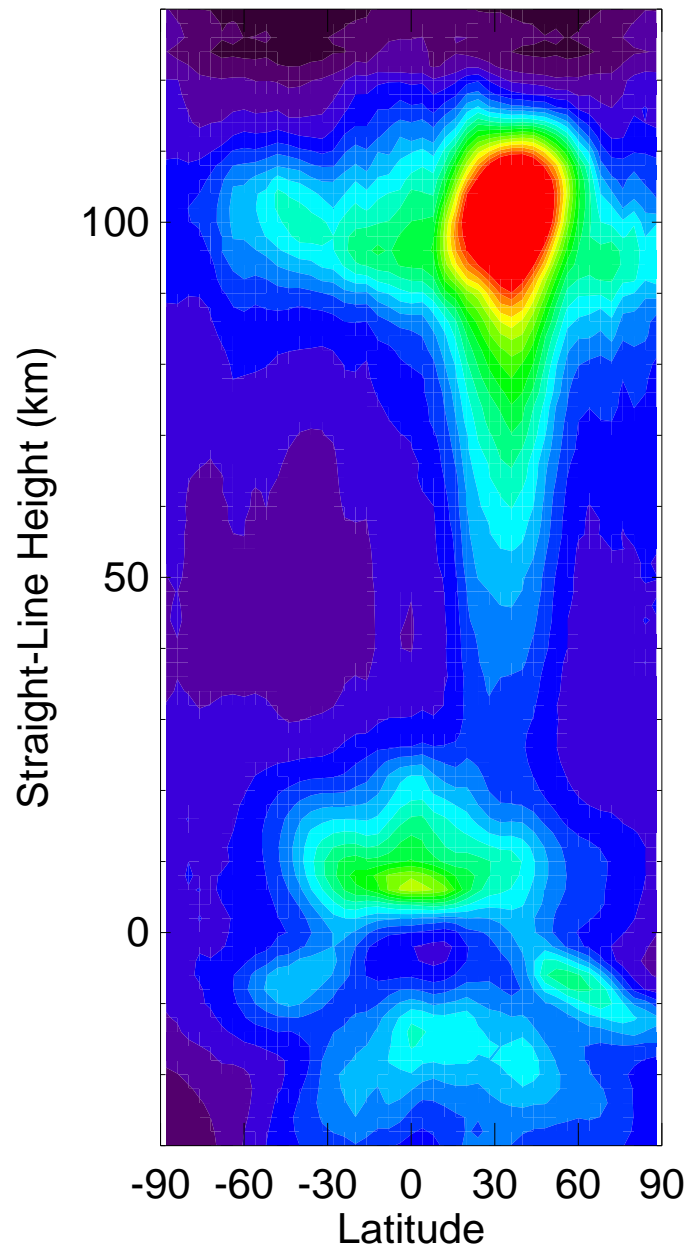

LST=23h, Lng=60W-10W

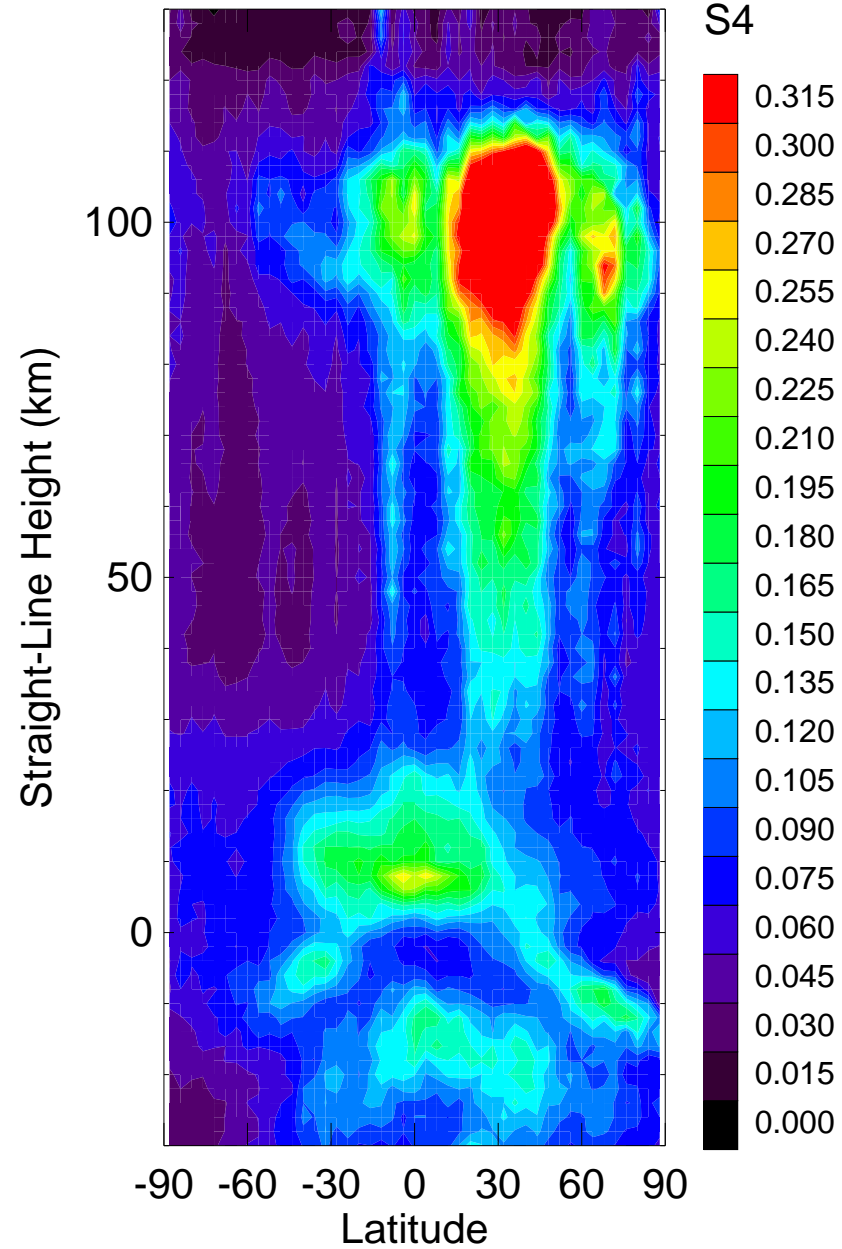

Aug, Zonal Mean

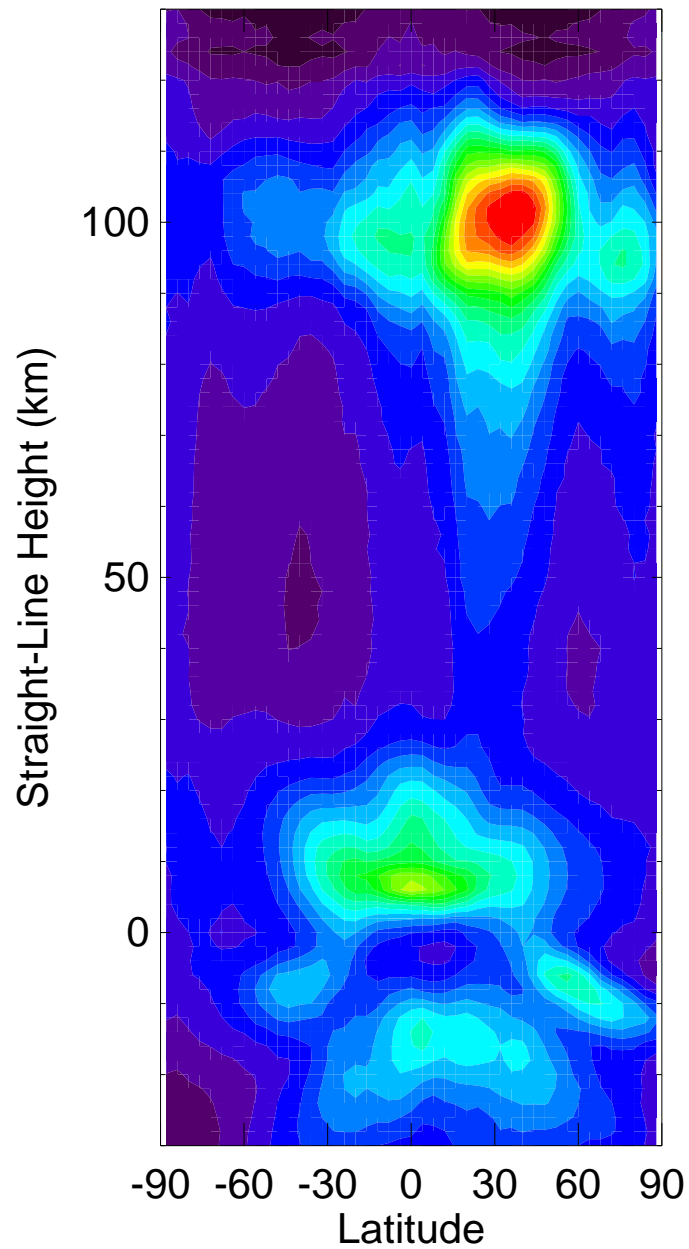

LST=23h, Lng=60W-10W

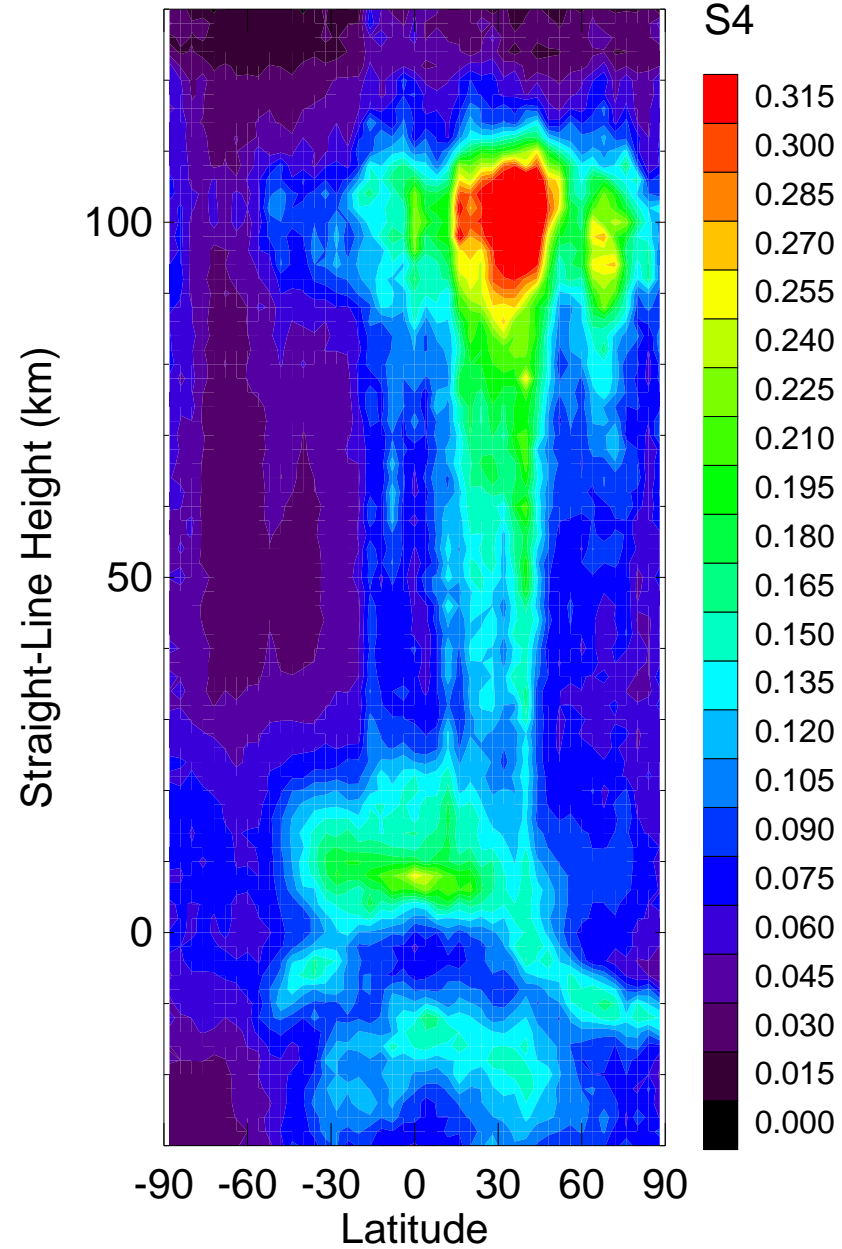



Sep, Zonal Mean

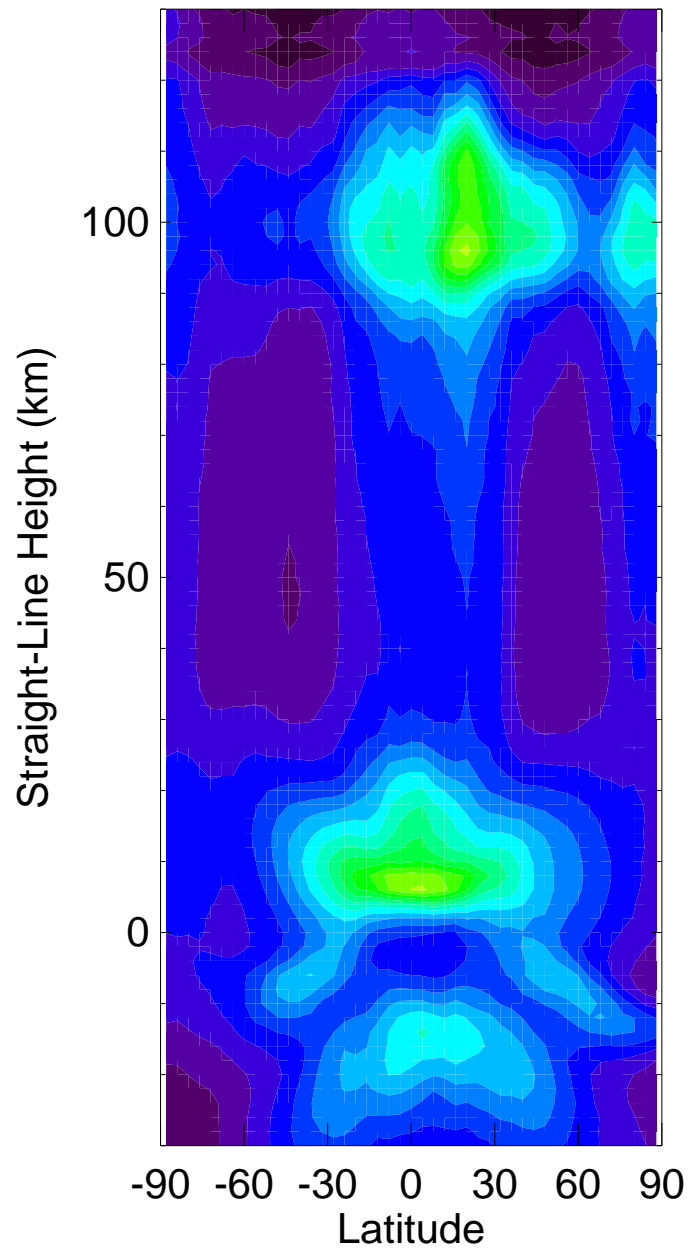

LST=23h, Lng=60W-10W

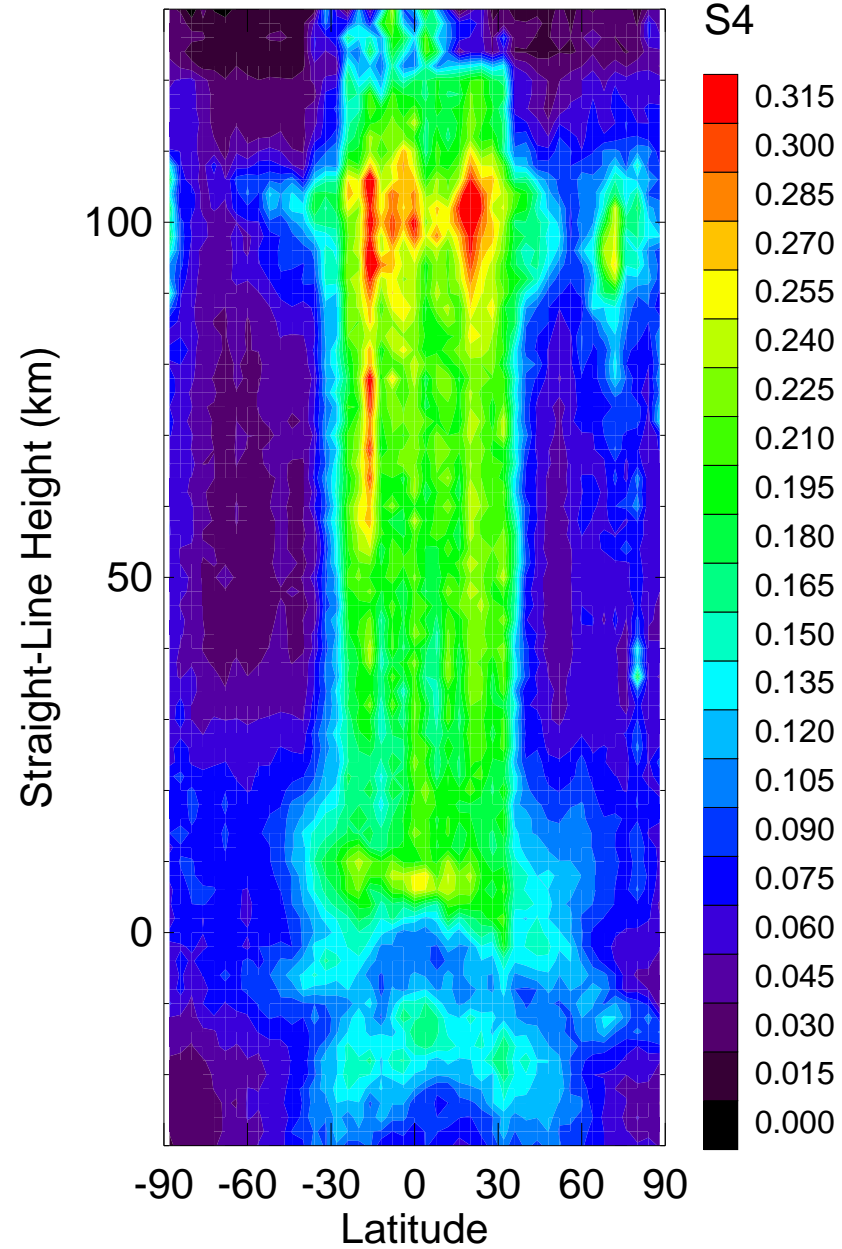

Oct, Zonal Mean

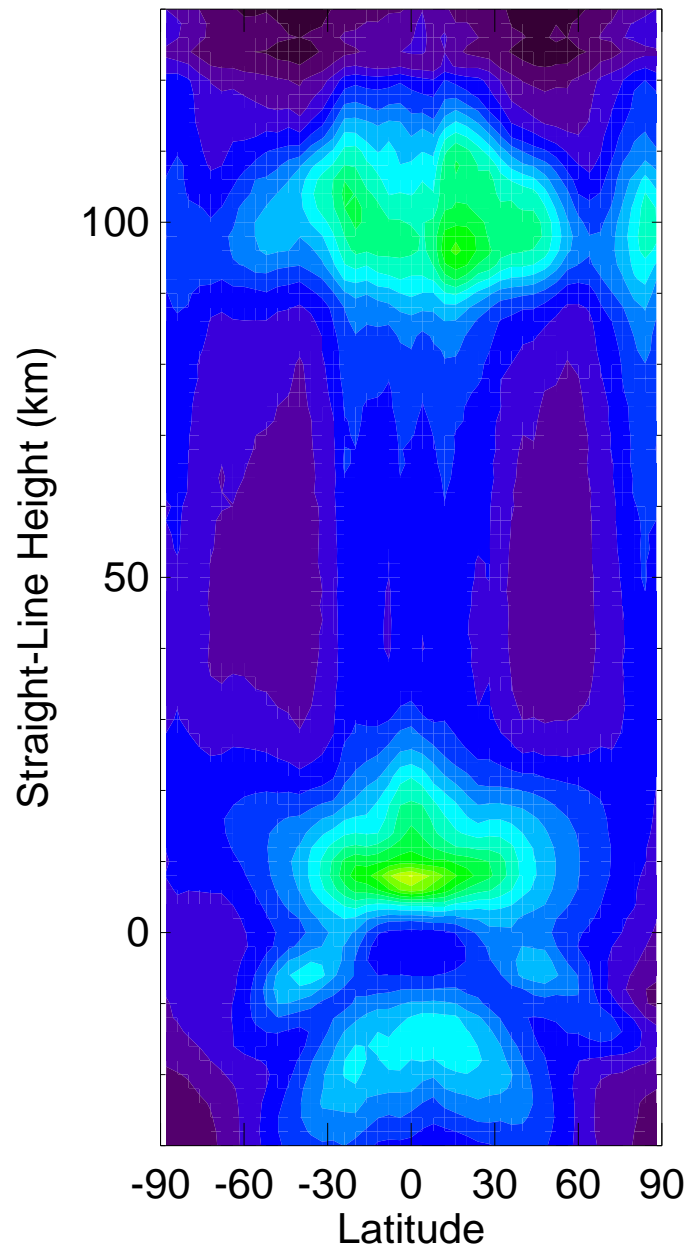

LST=23h, Lng=60W-10W

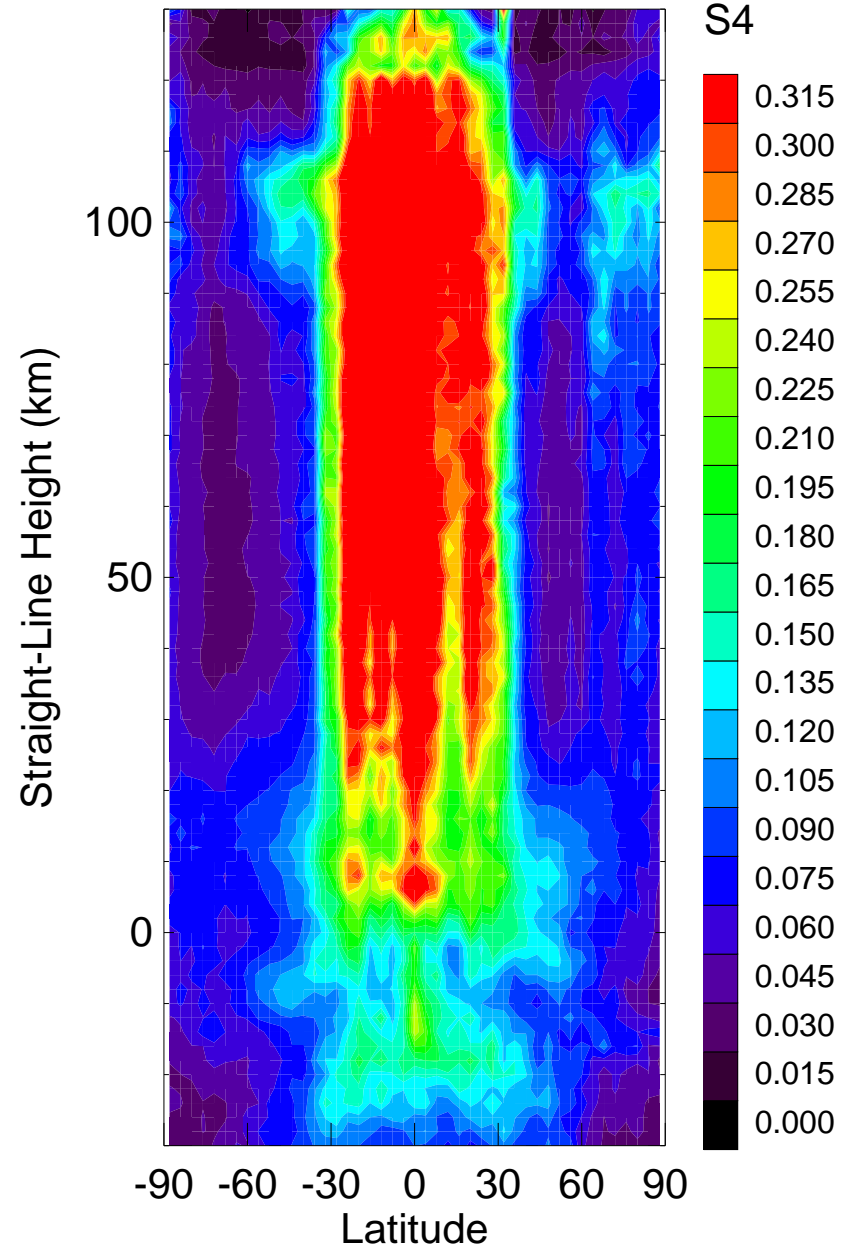

Nov, Zonal Mean

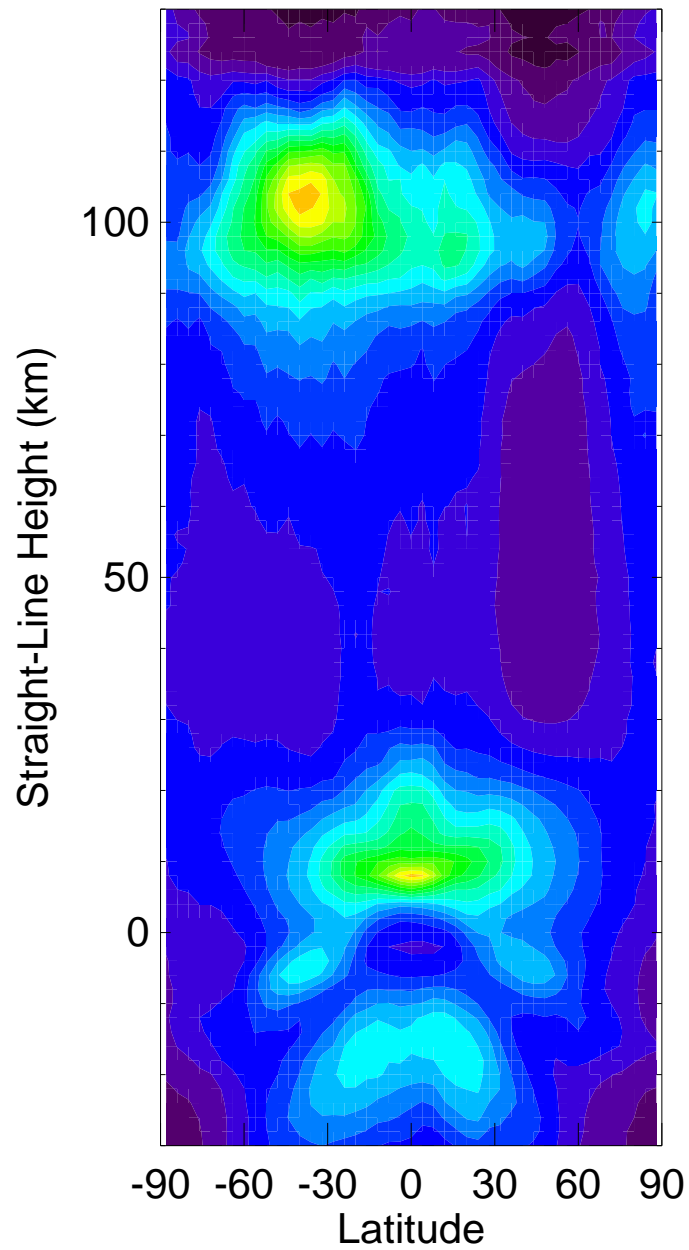

LST=23h, Lng=60W-10W

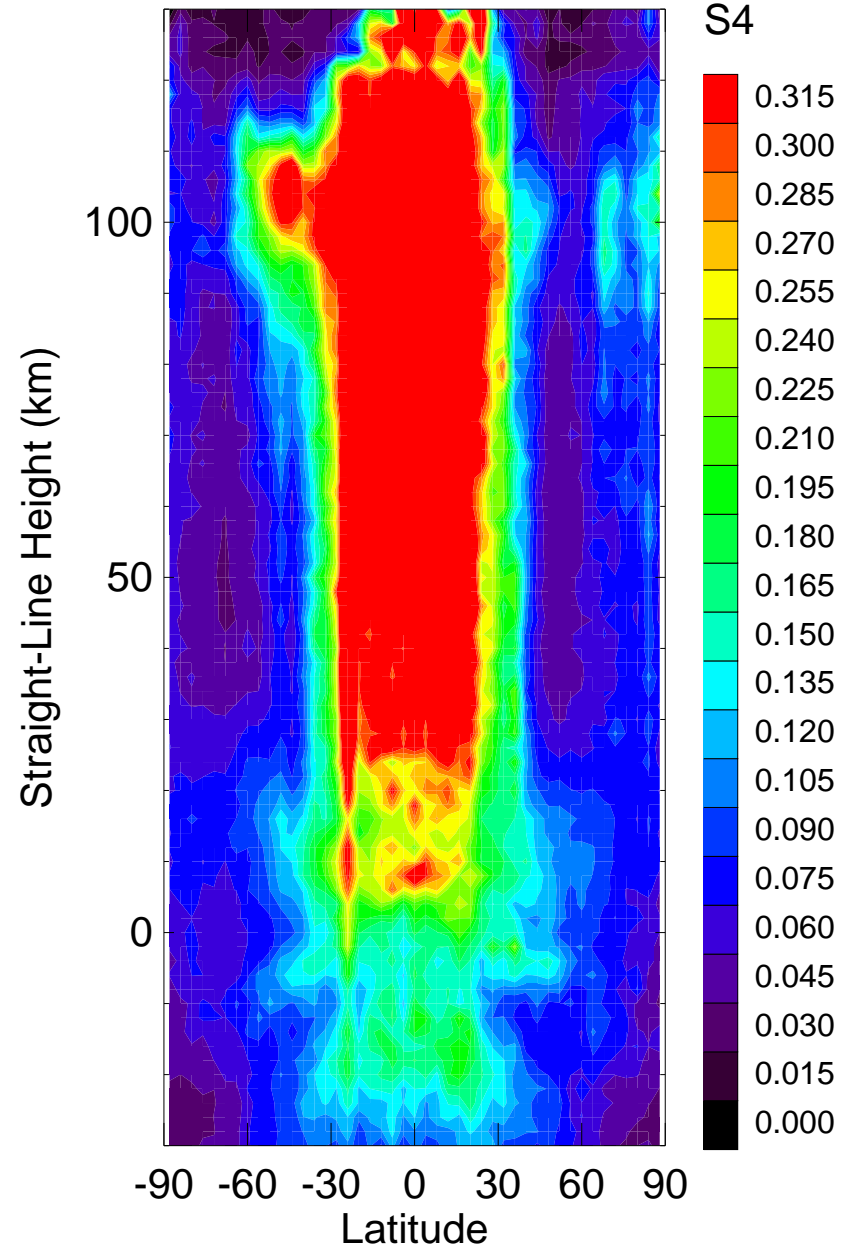

Dec, Zonal Mean

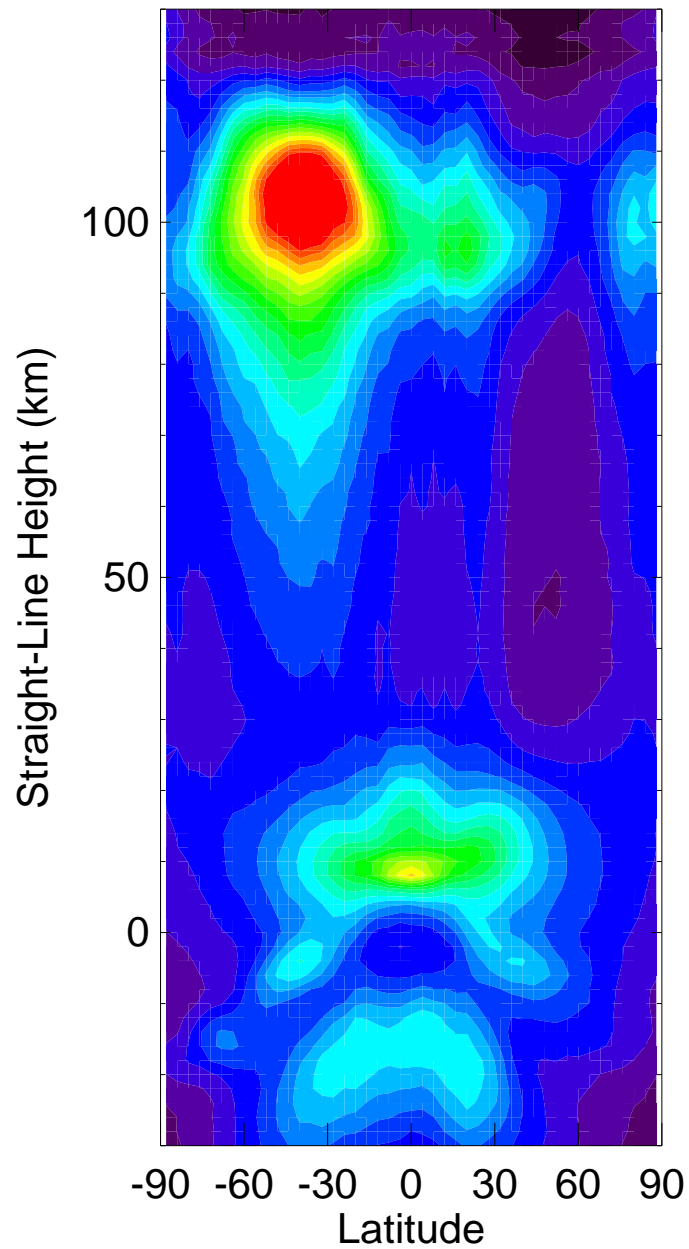

LST=23h, Lng=60W-10W

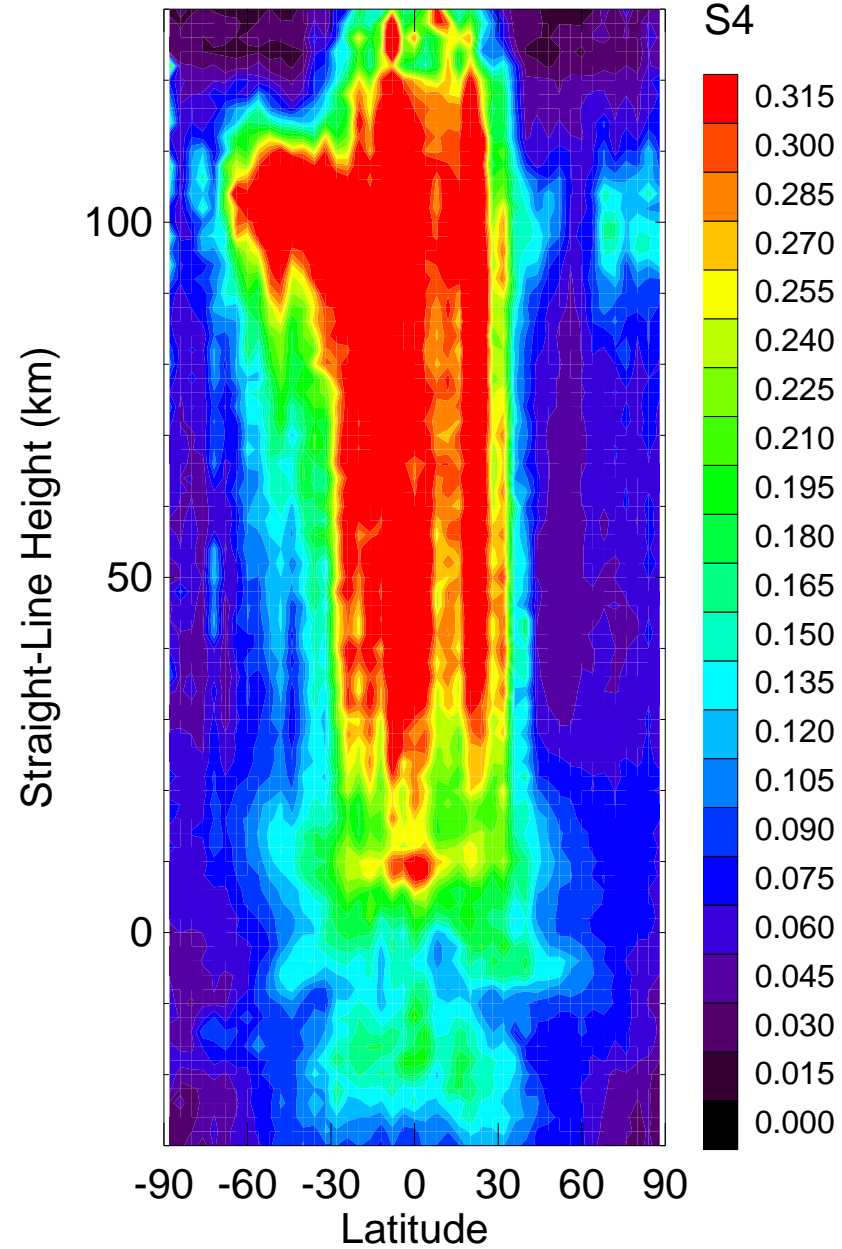

Supplement: s1 [file s1]
