# Supplementary material
Source: MDPI journal article supplement (https://www.mdpi.com/2072-4292/12/15/2373)

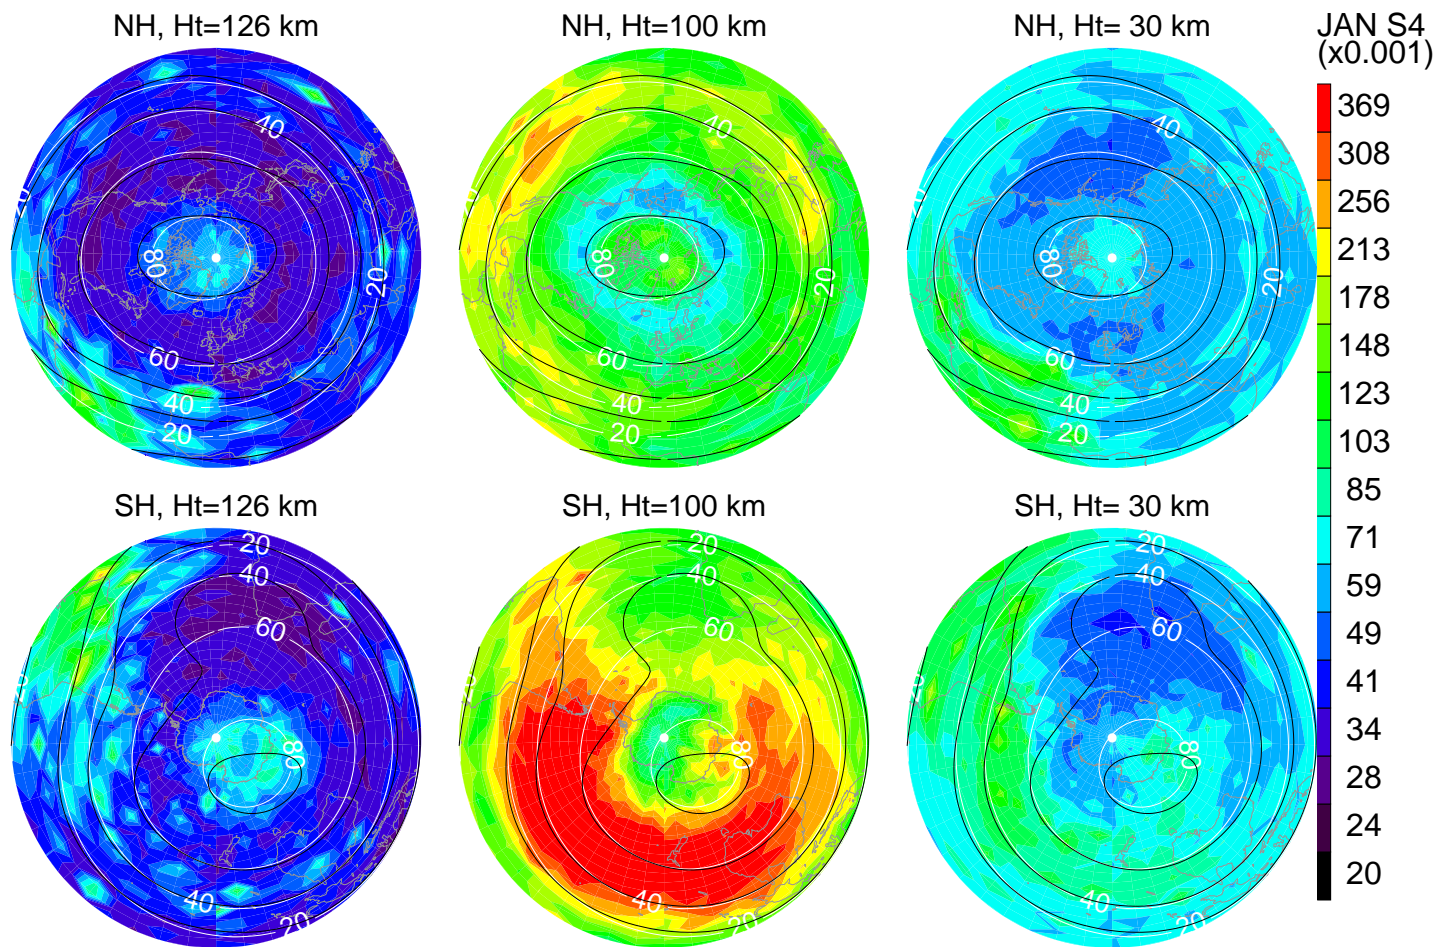

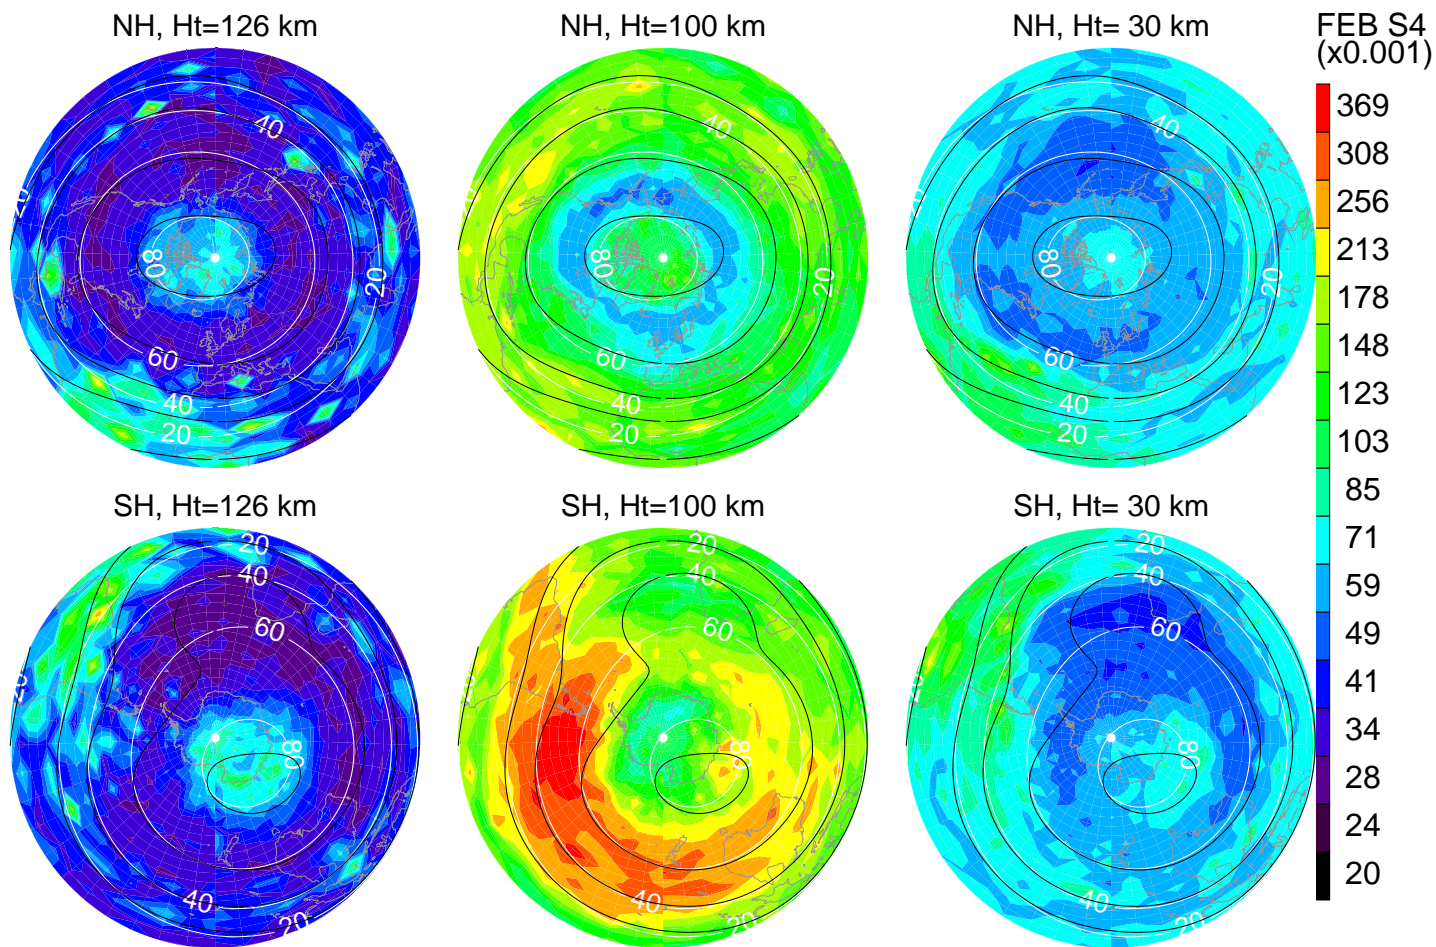

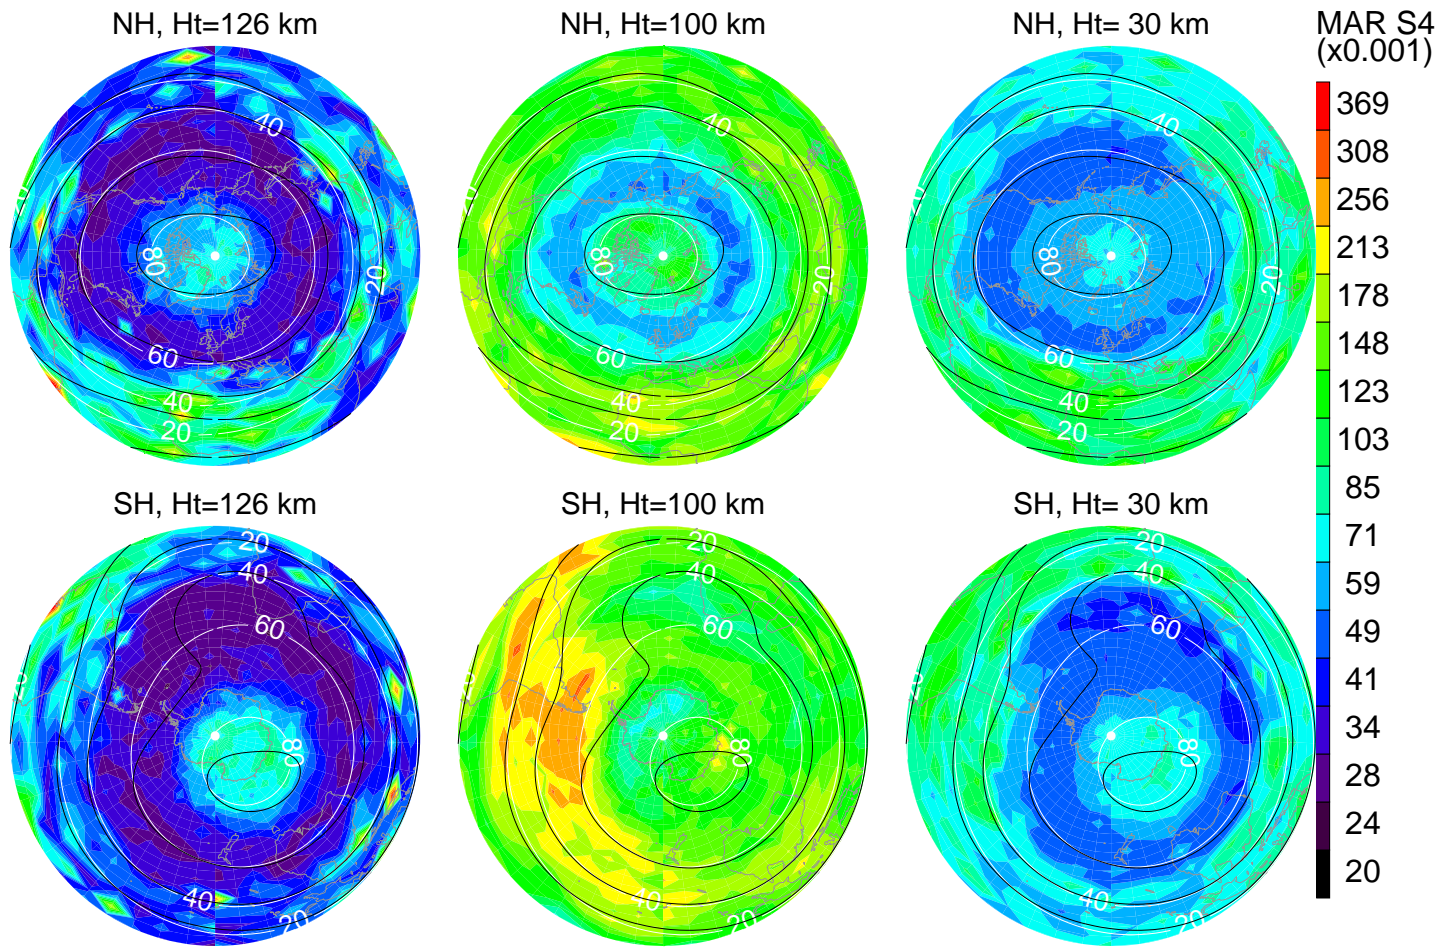



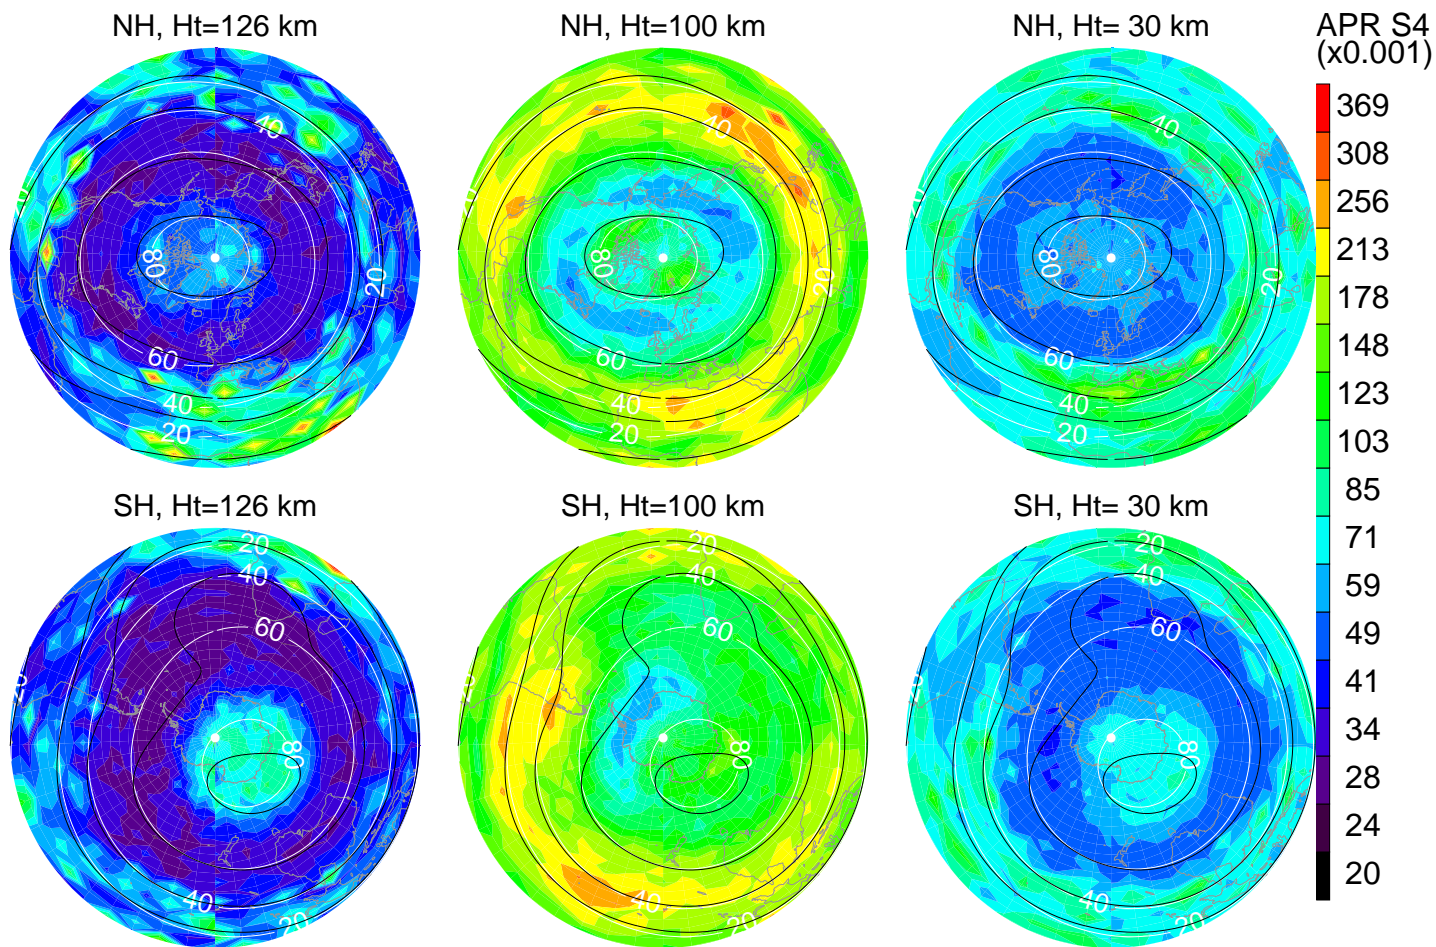

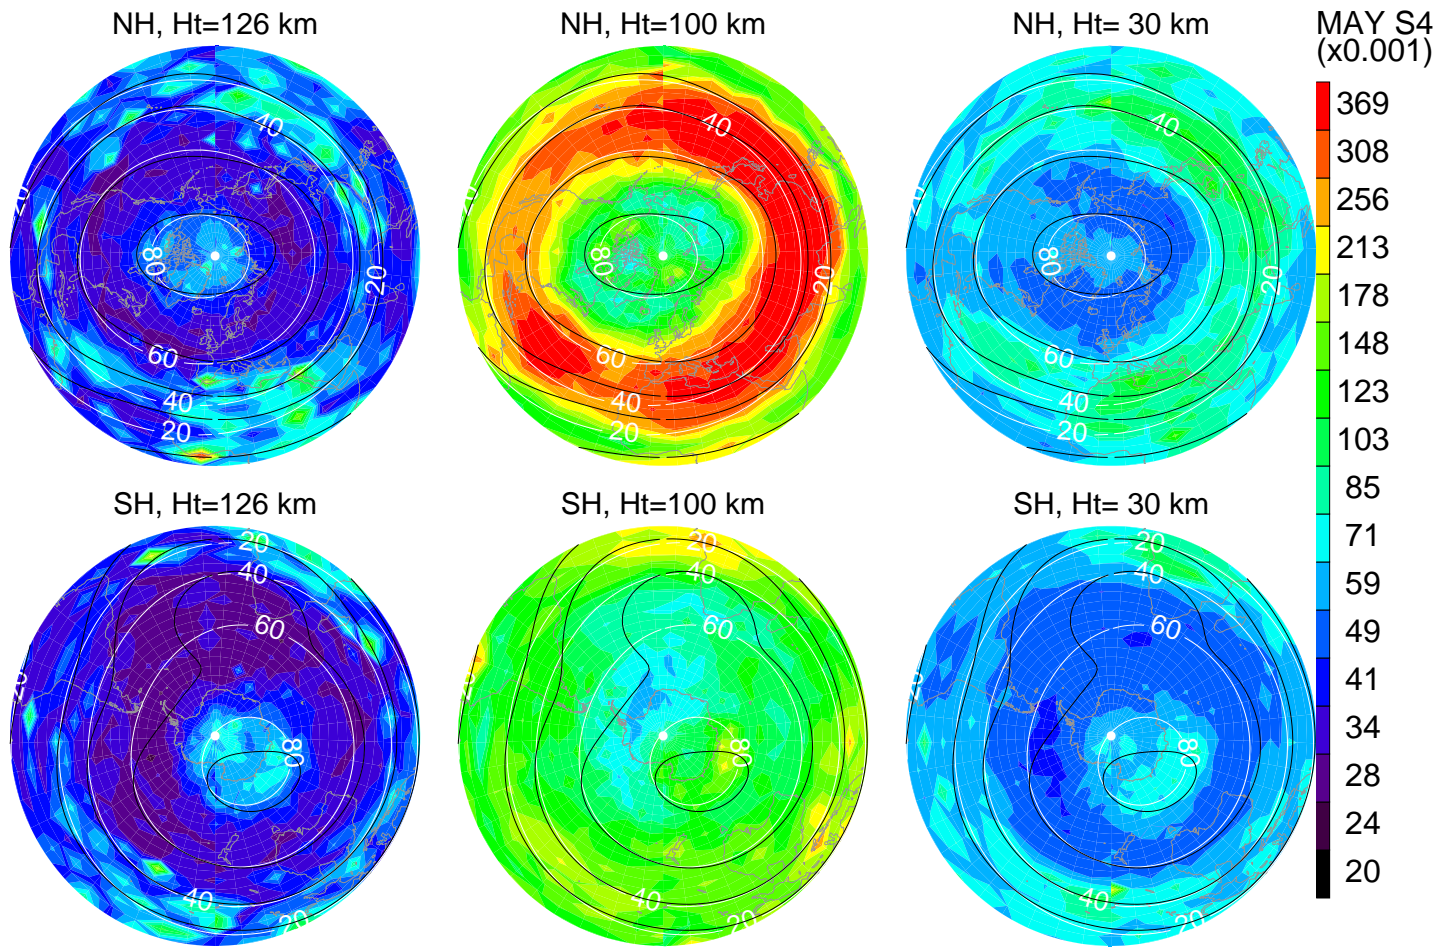

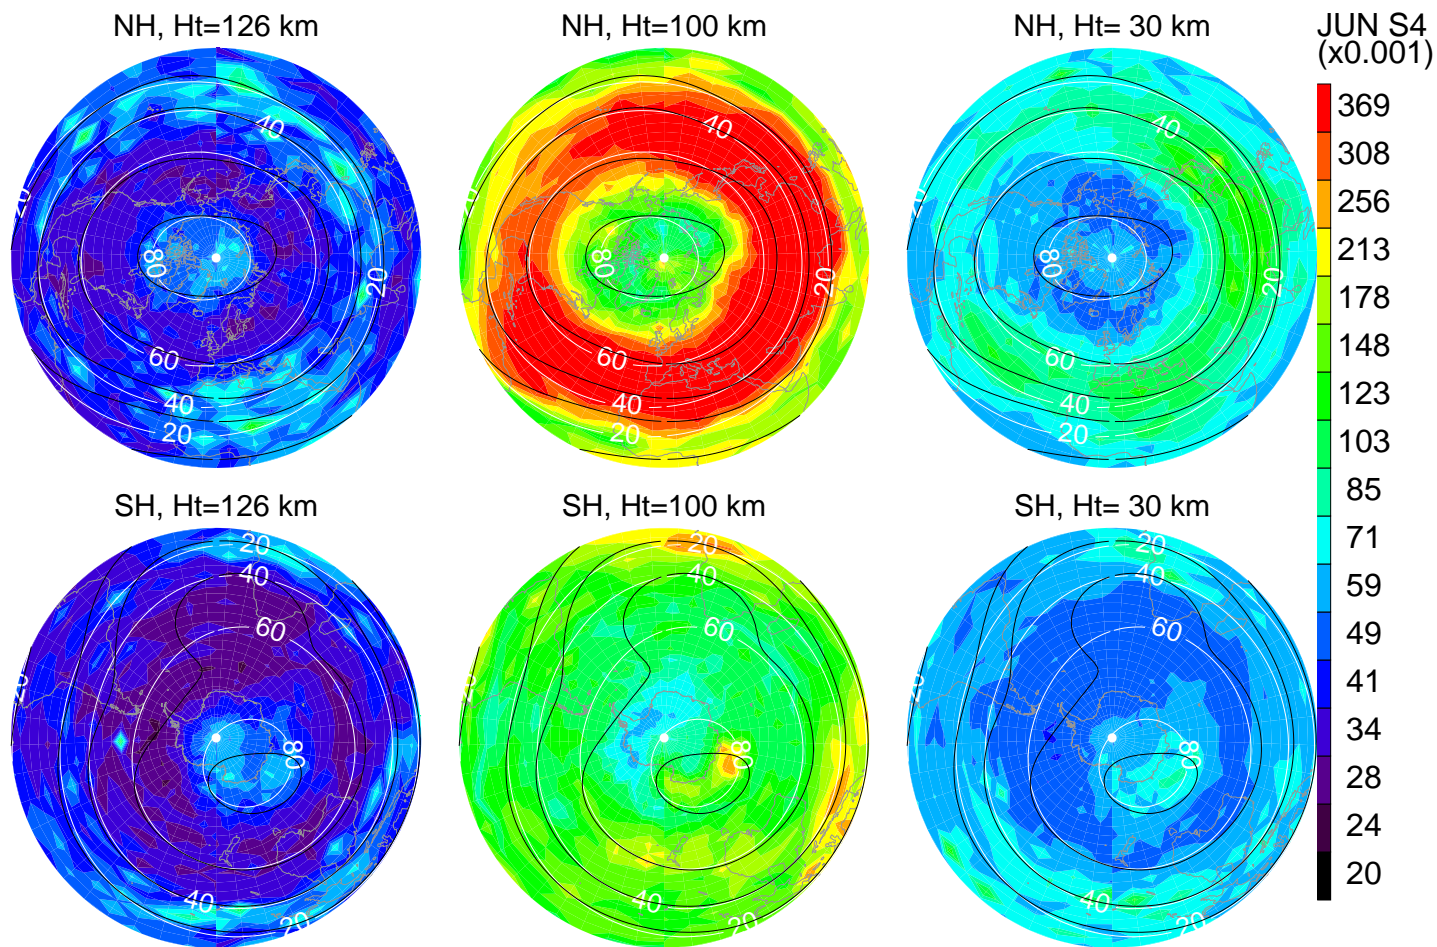



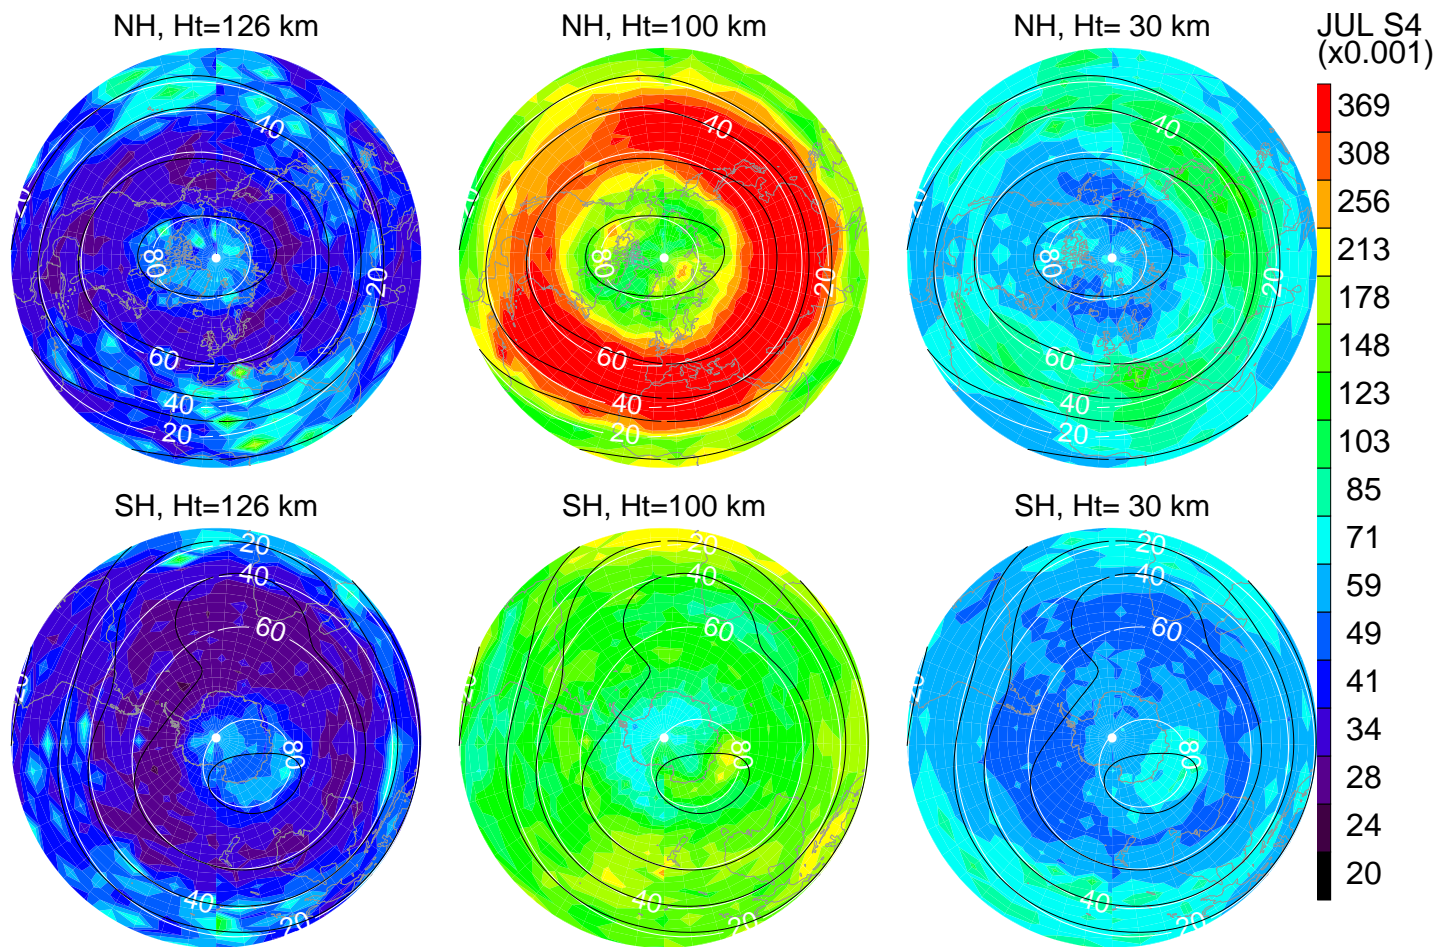

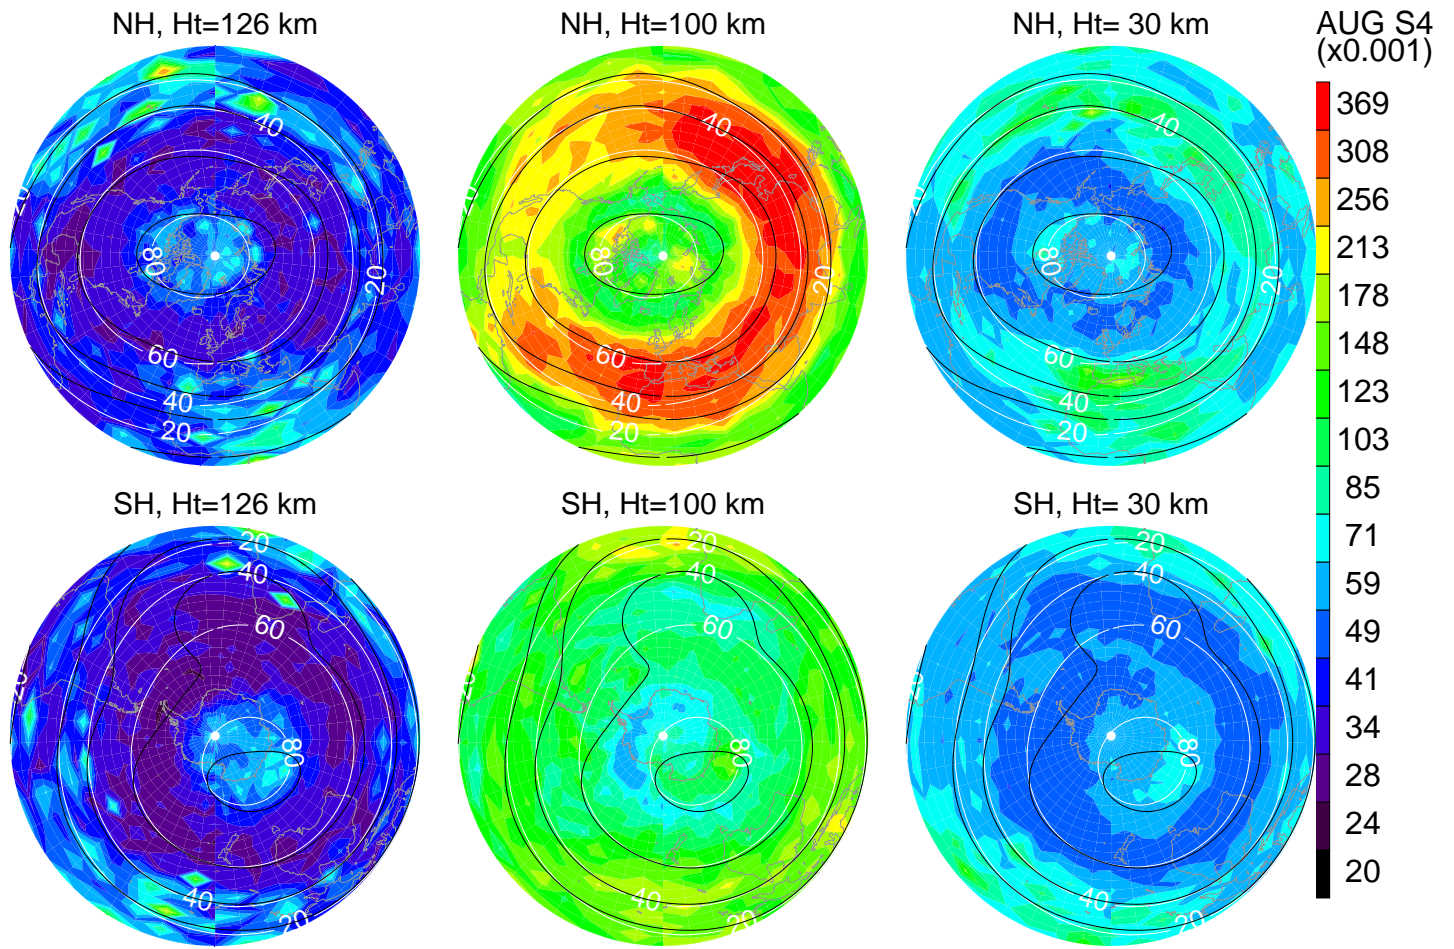



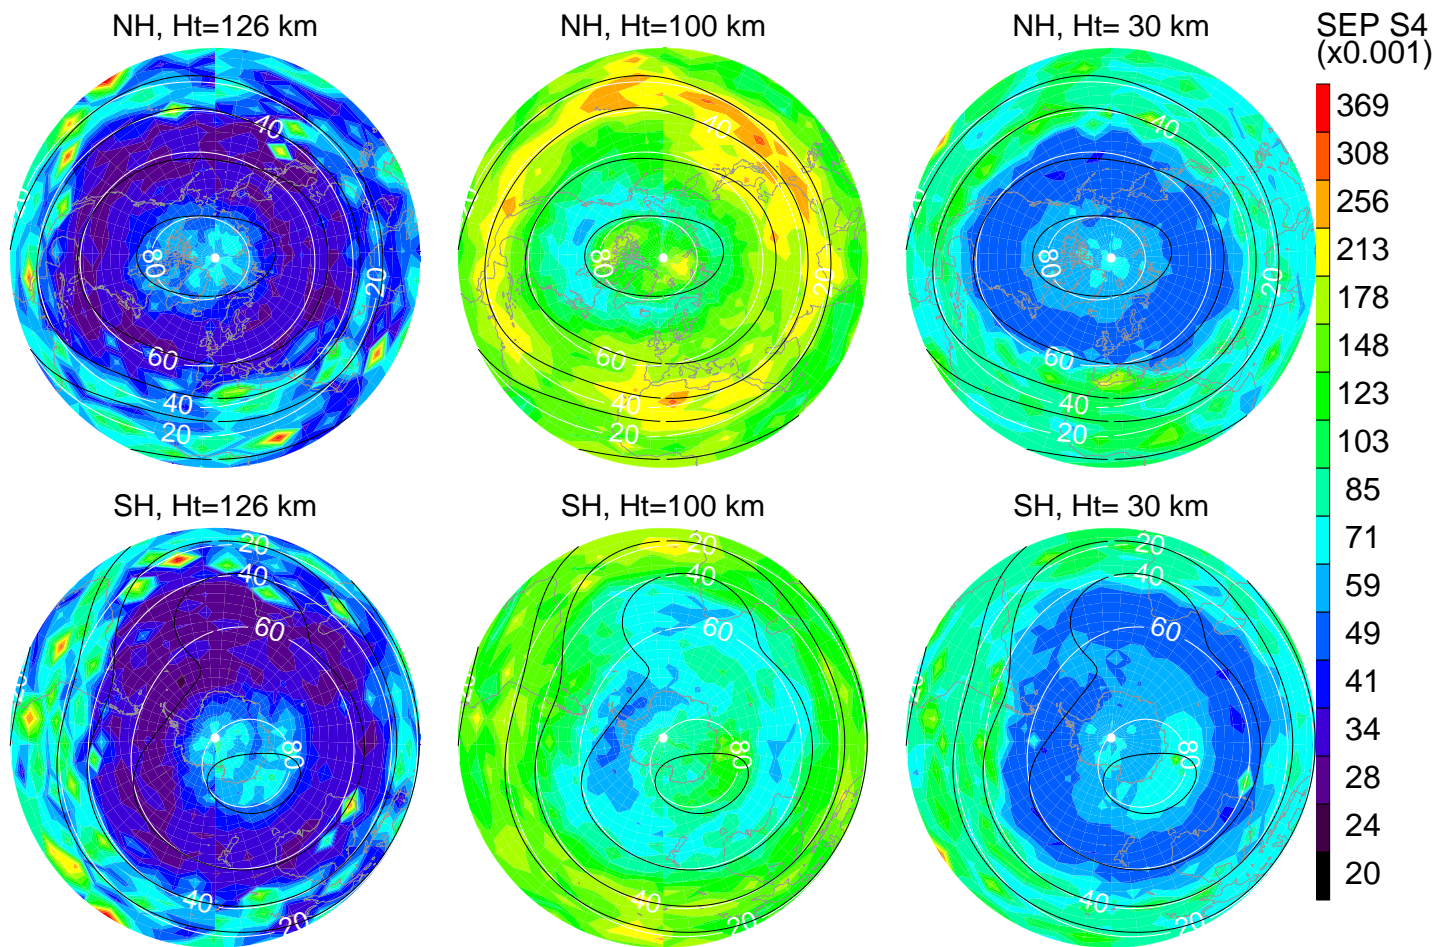

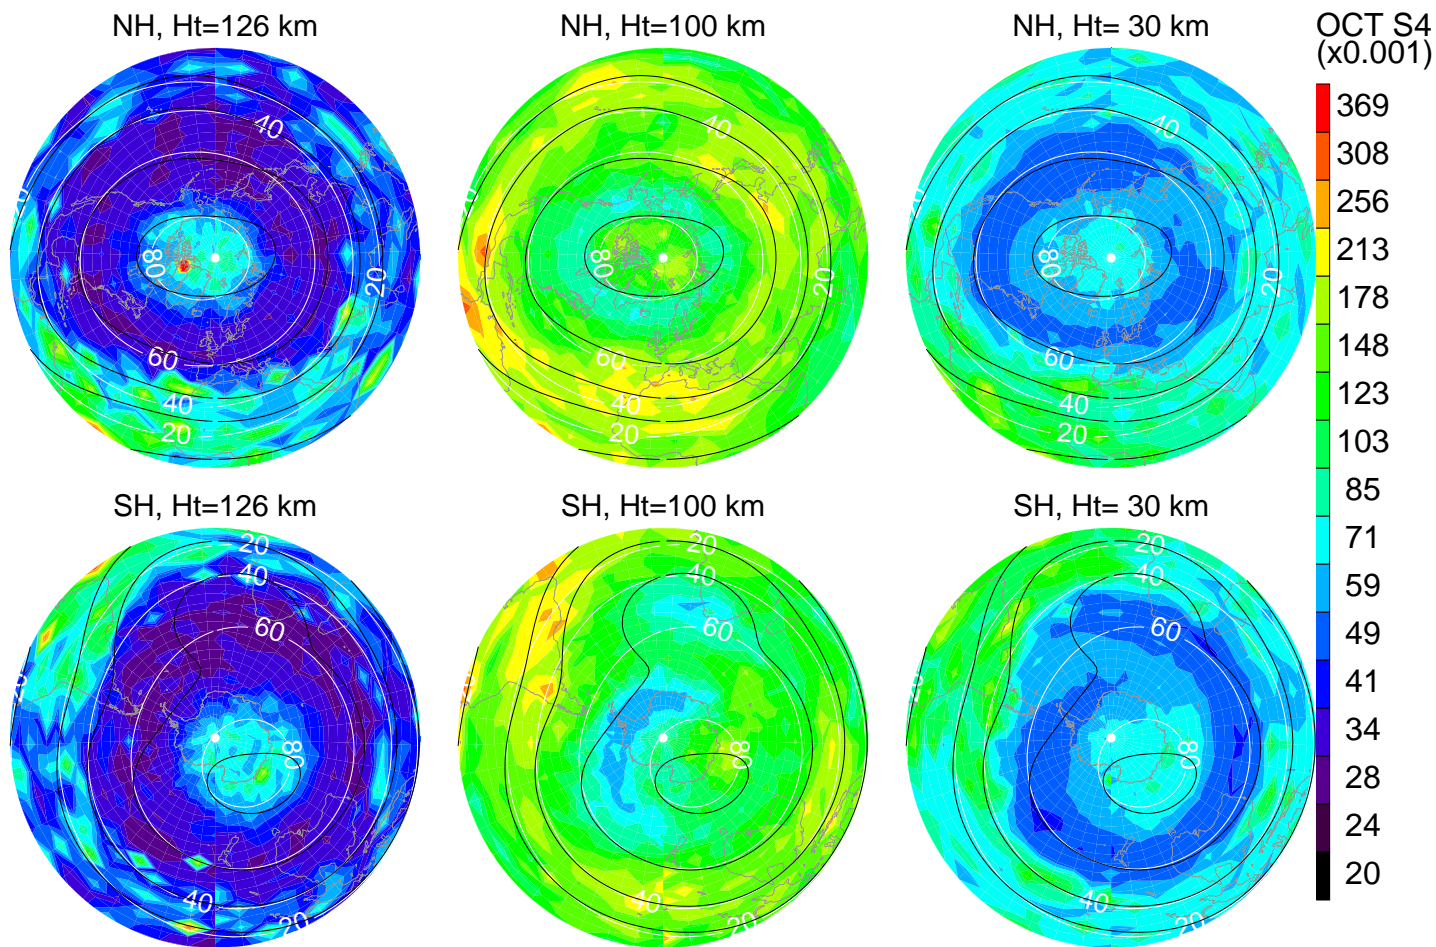

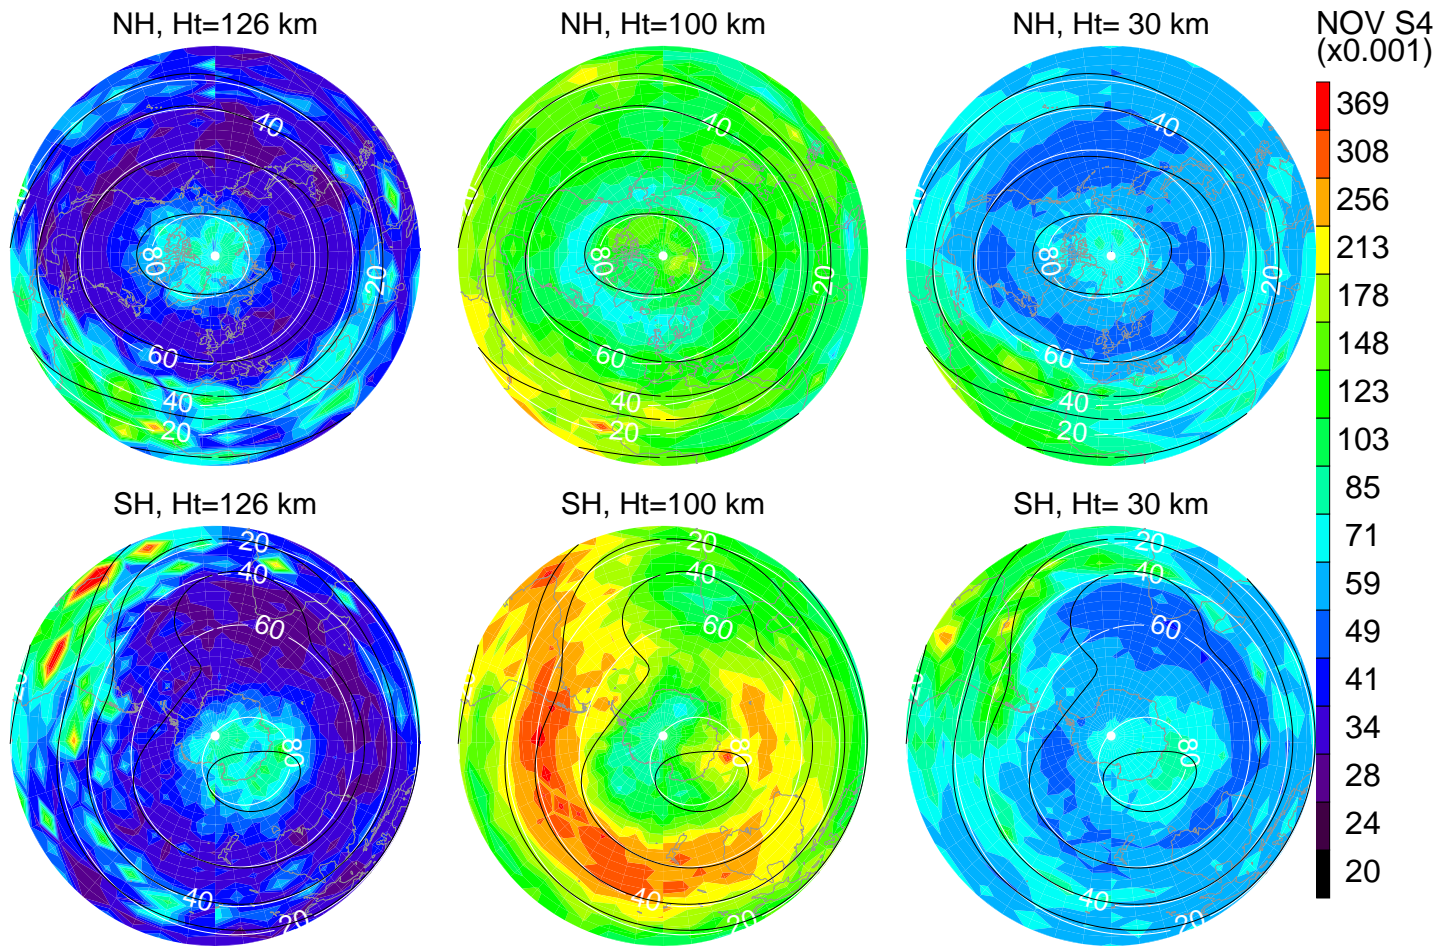



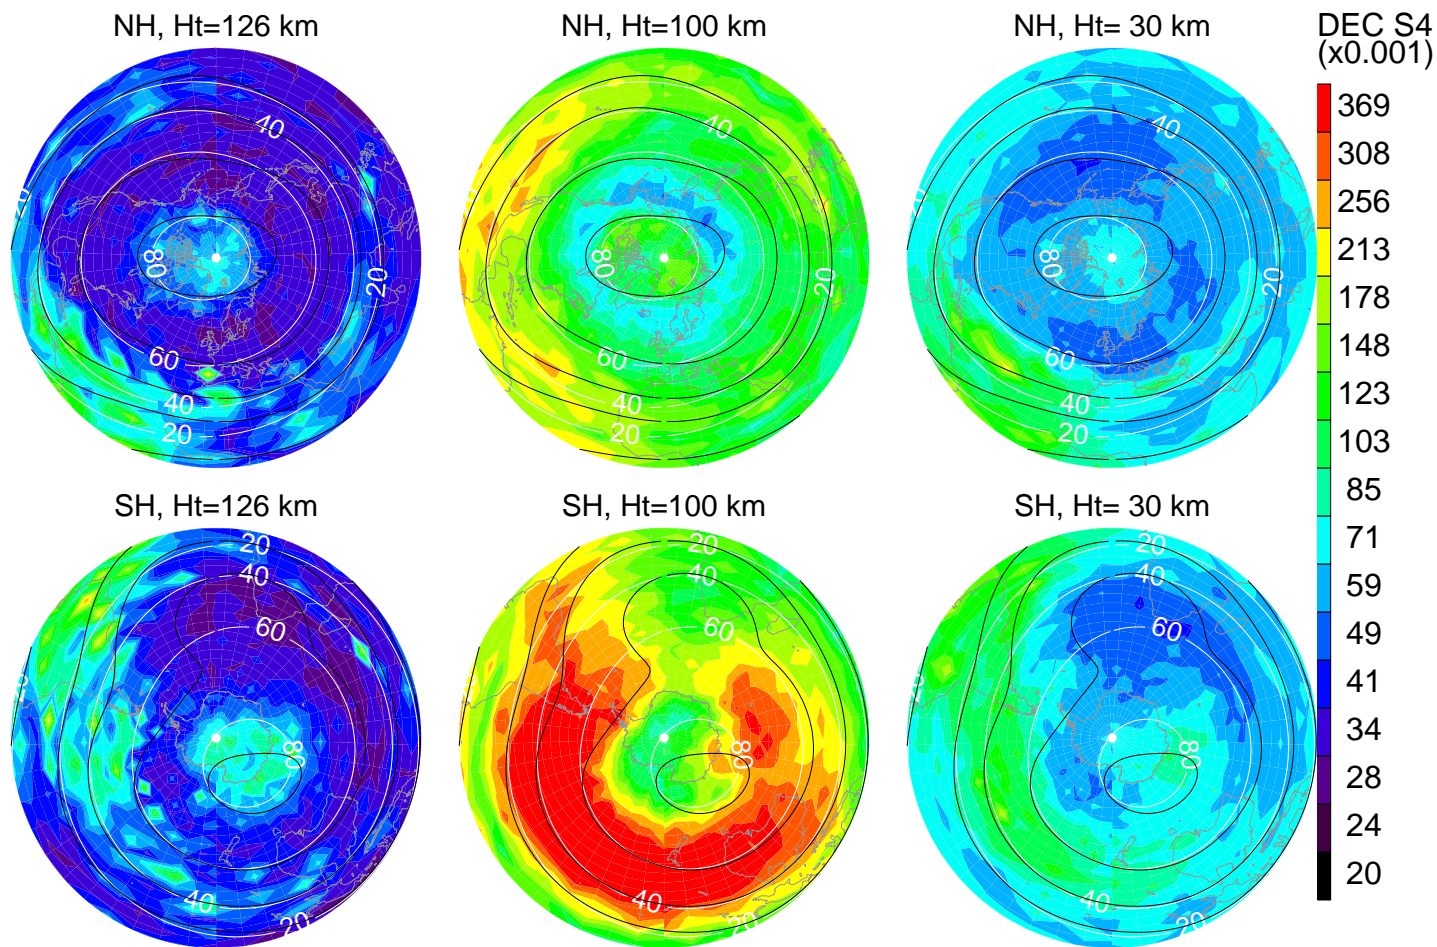

Supplement: s1 [file s1]

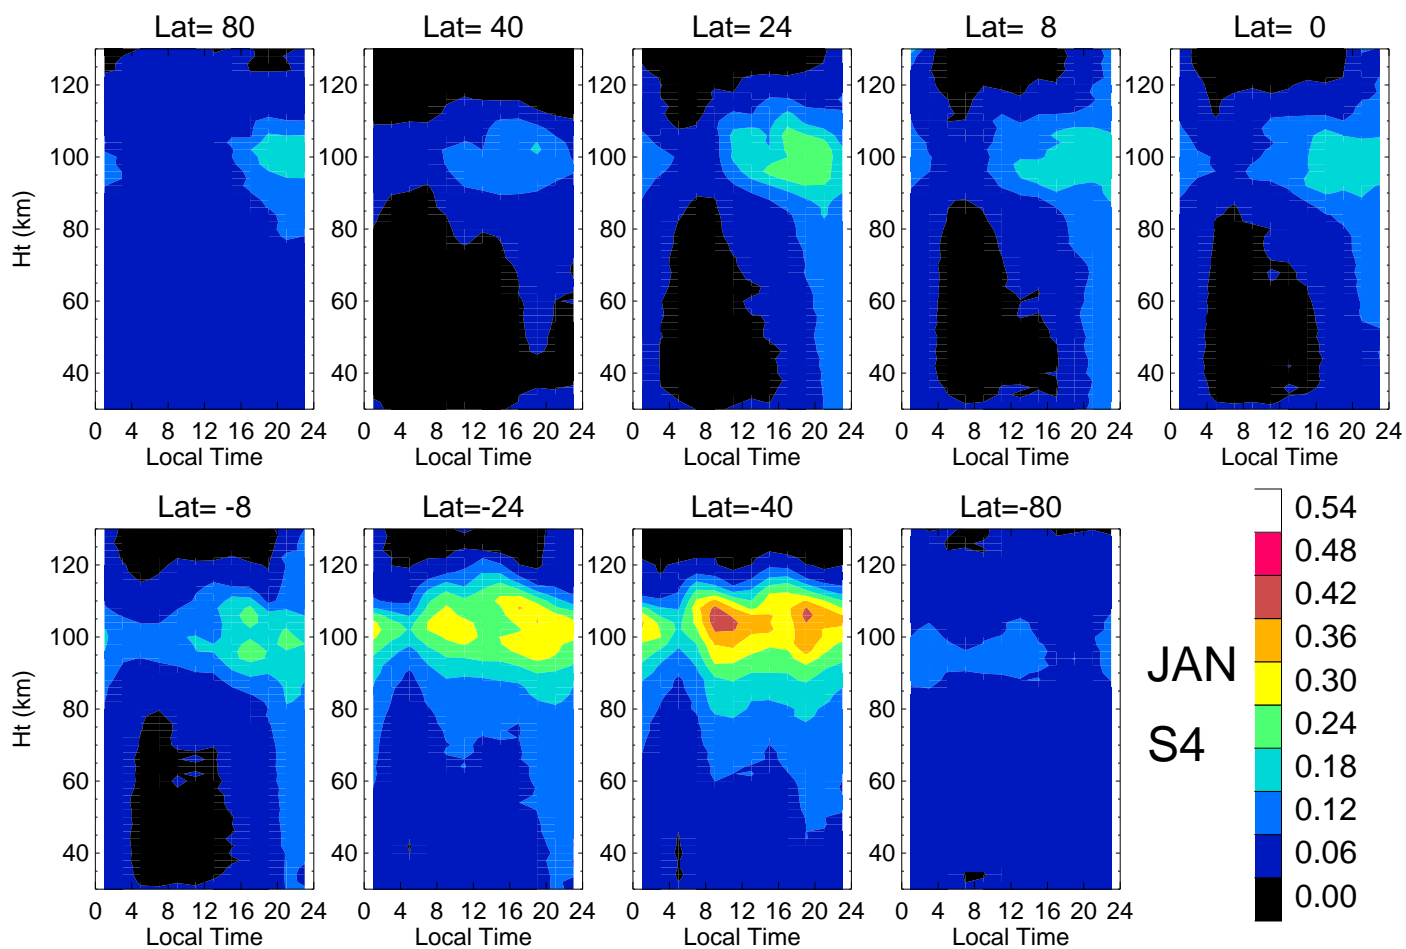

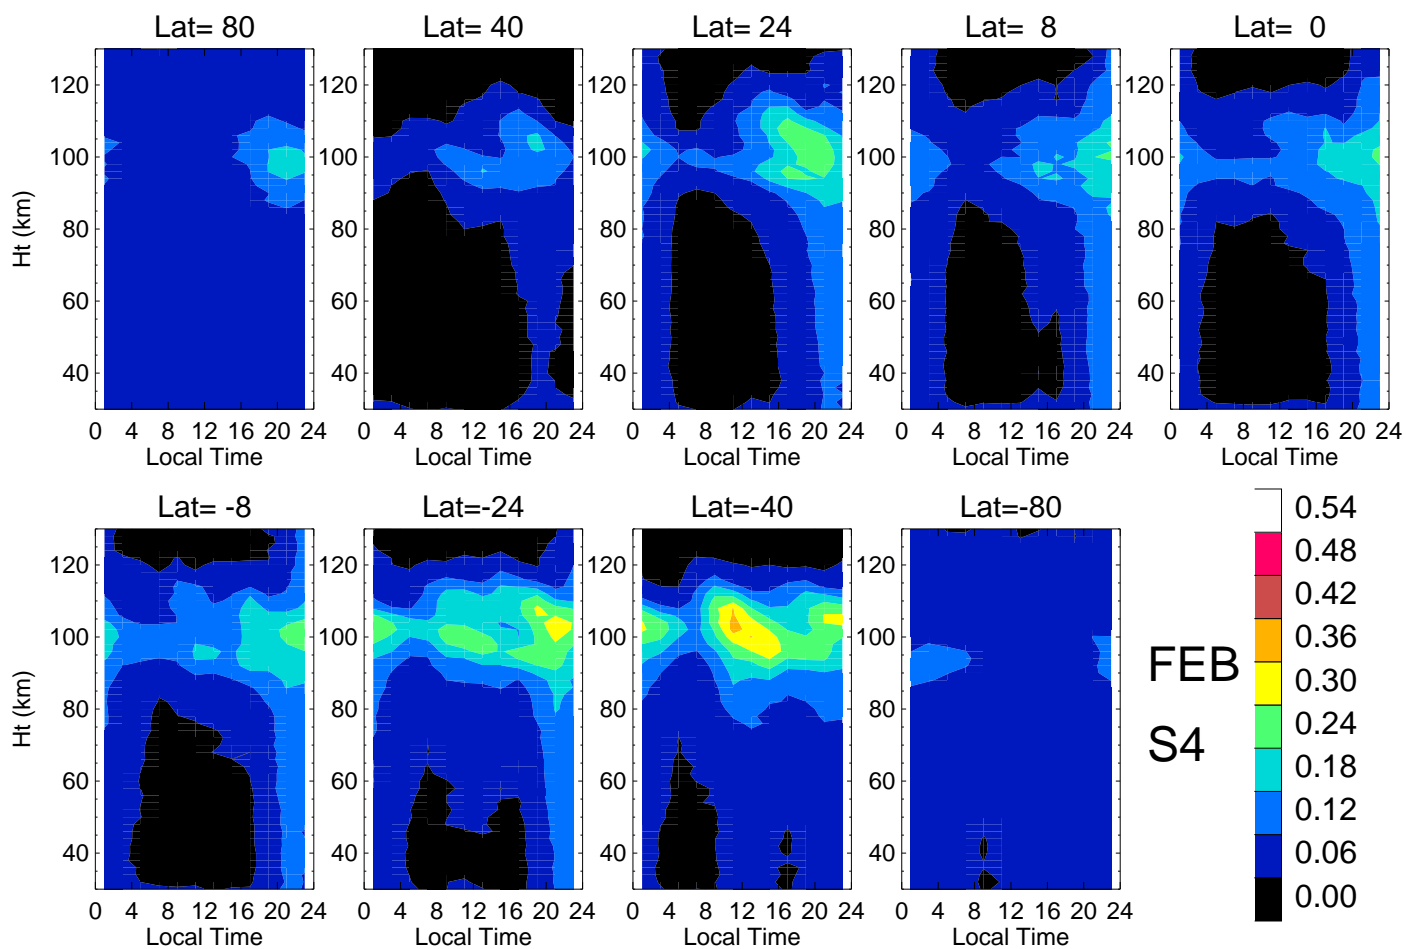

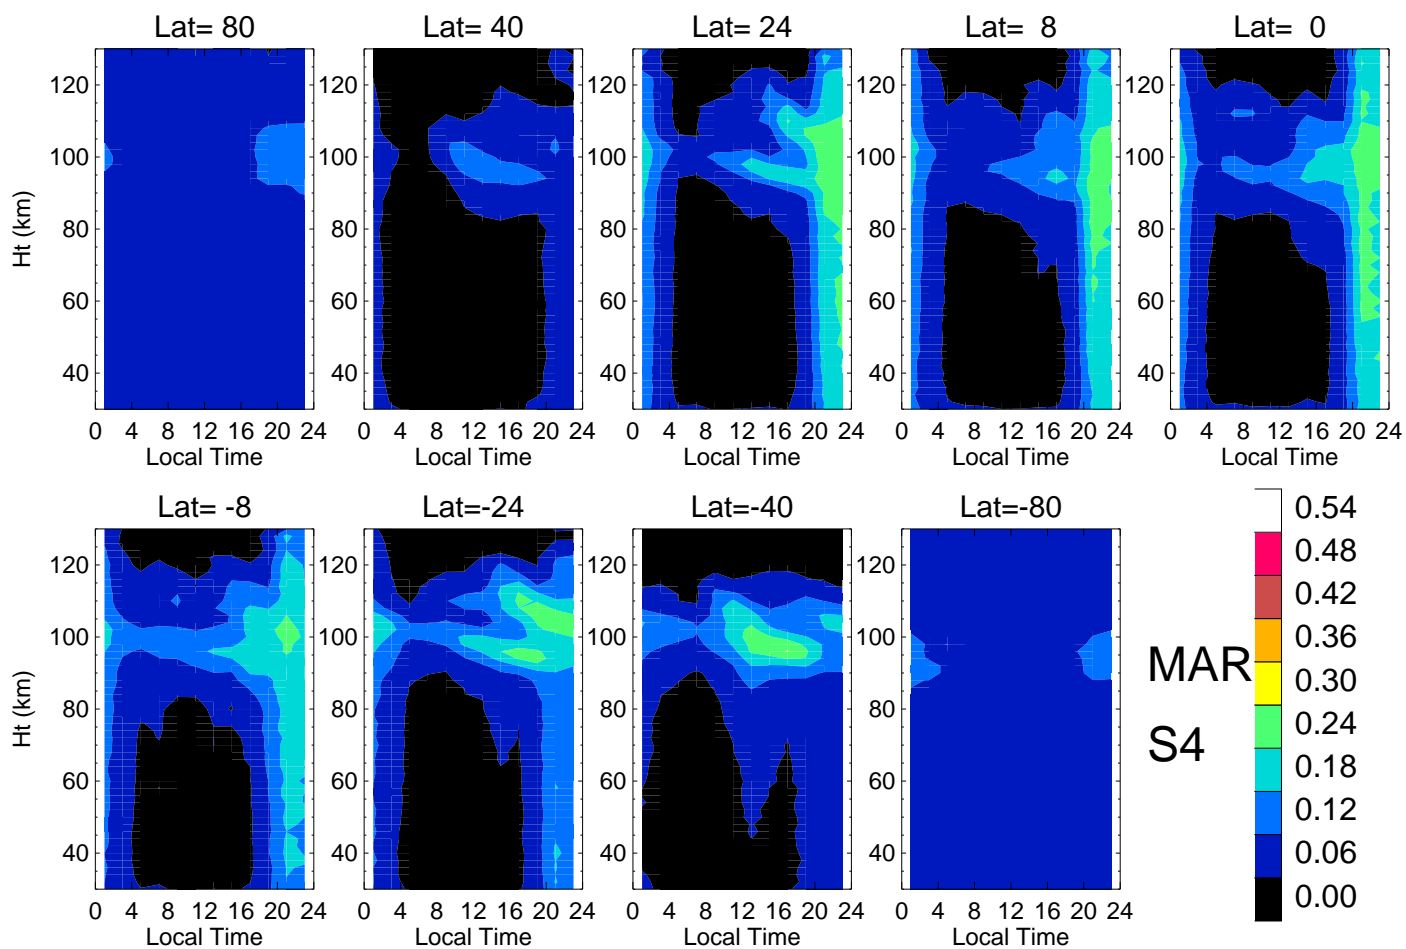

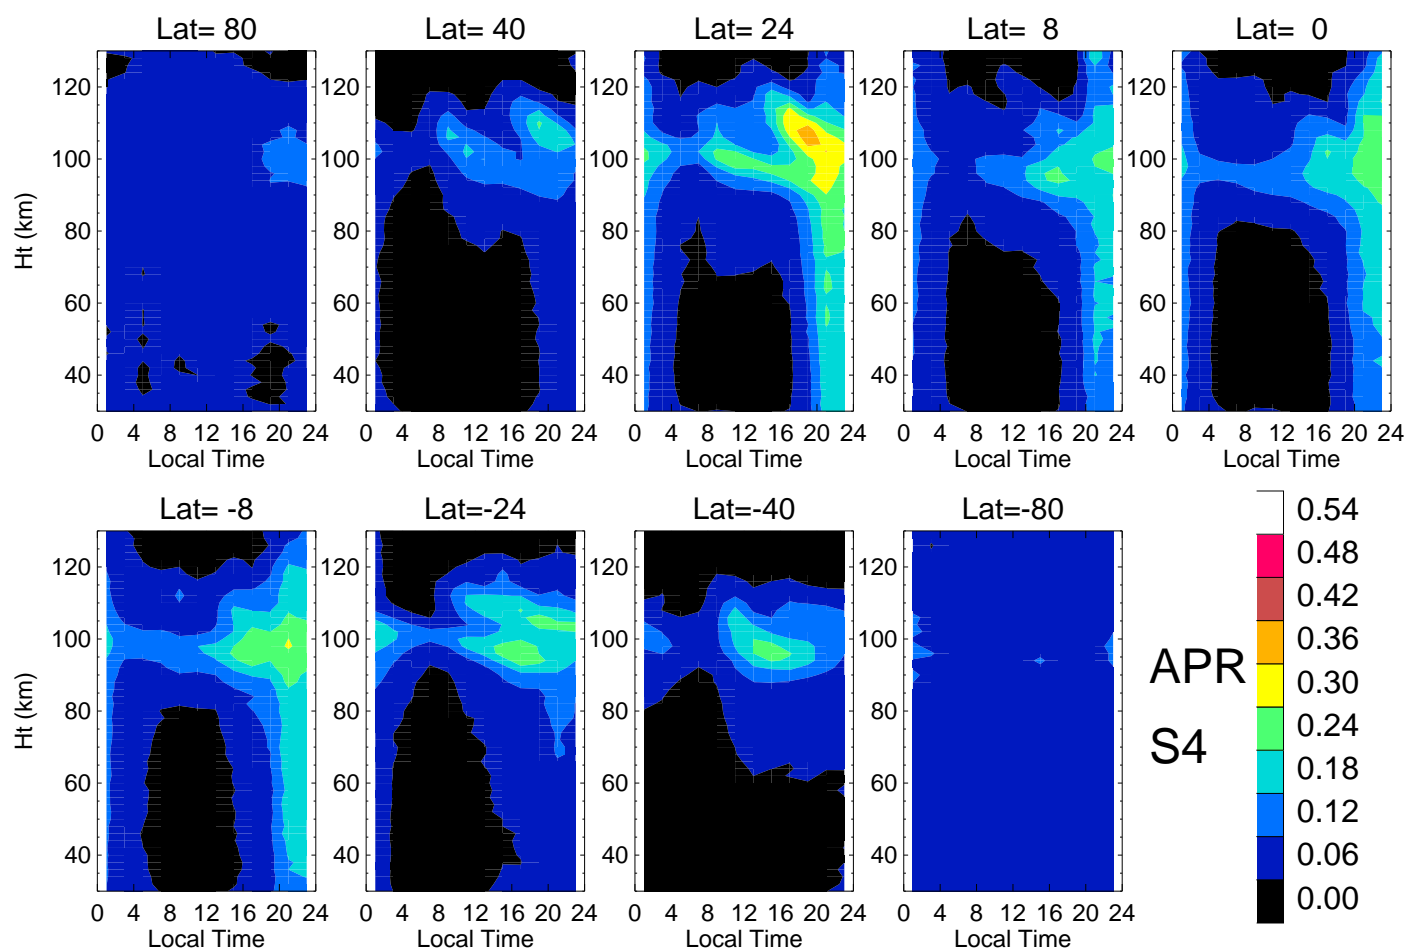

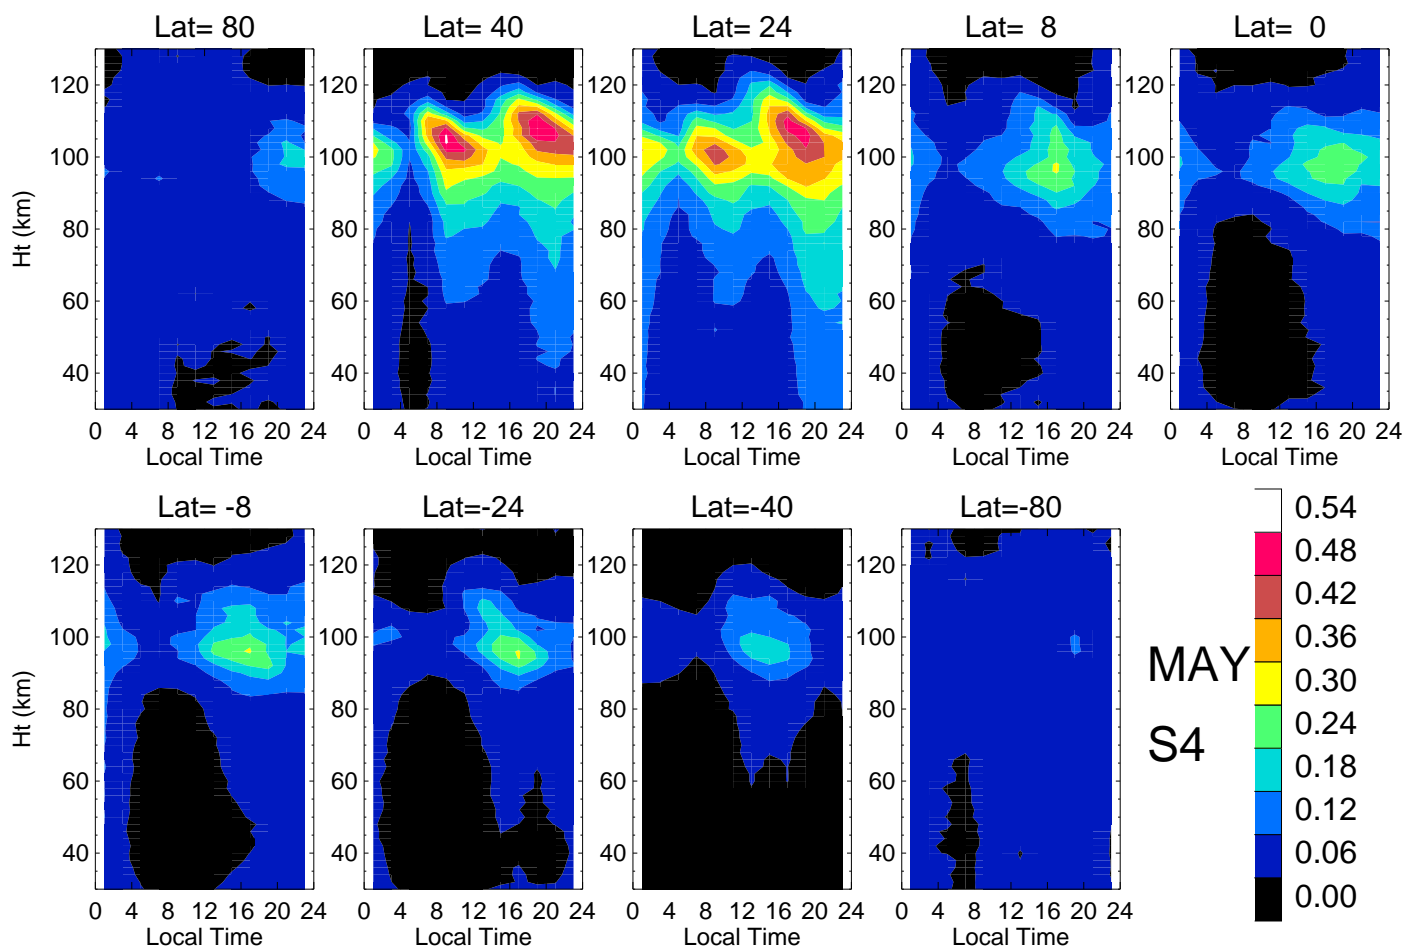

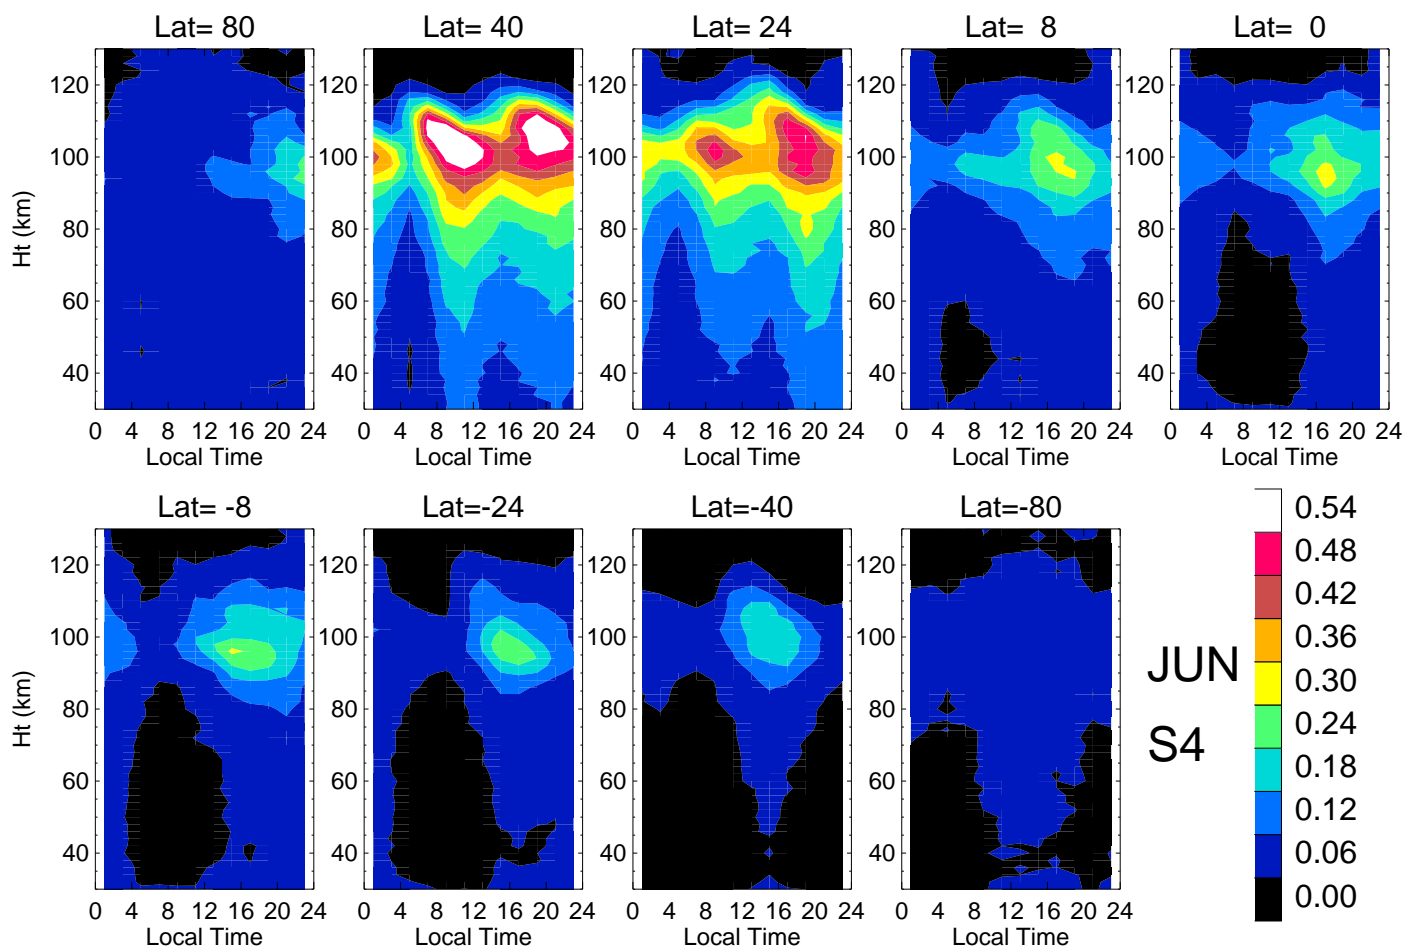

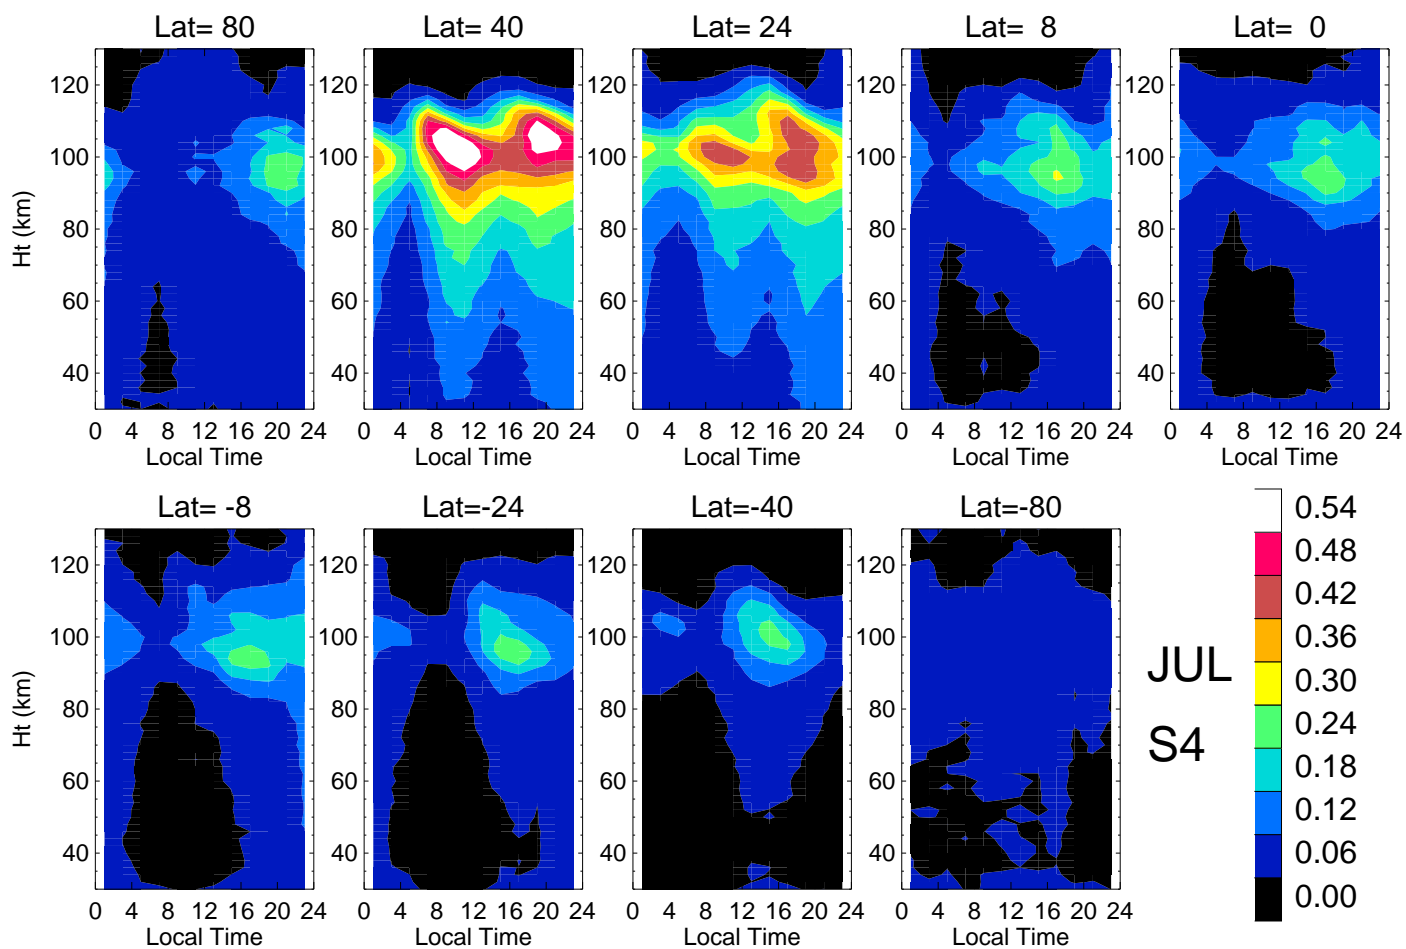

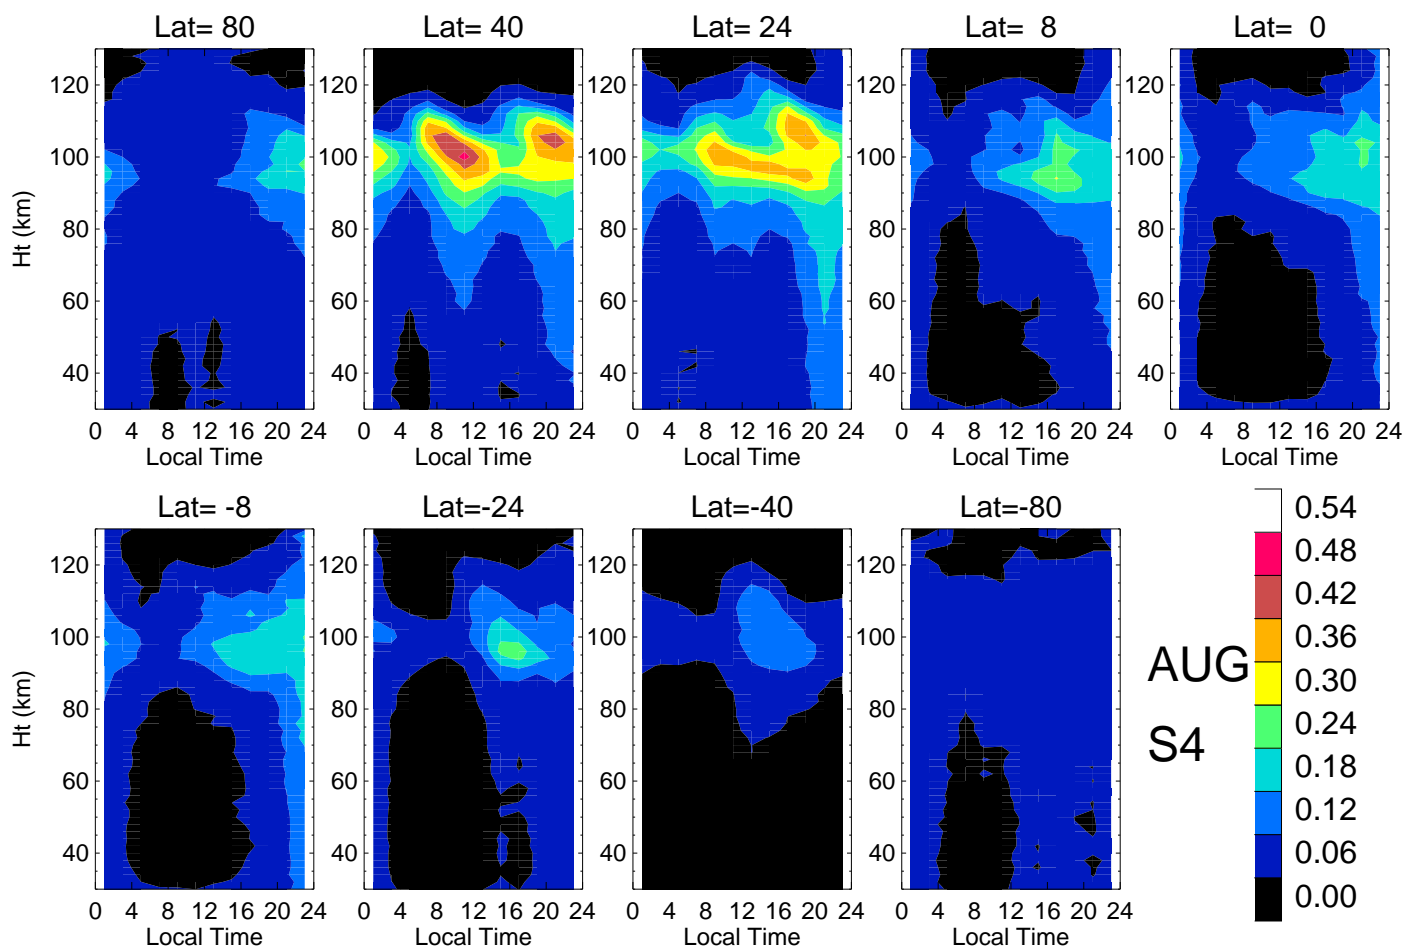



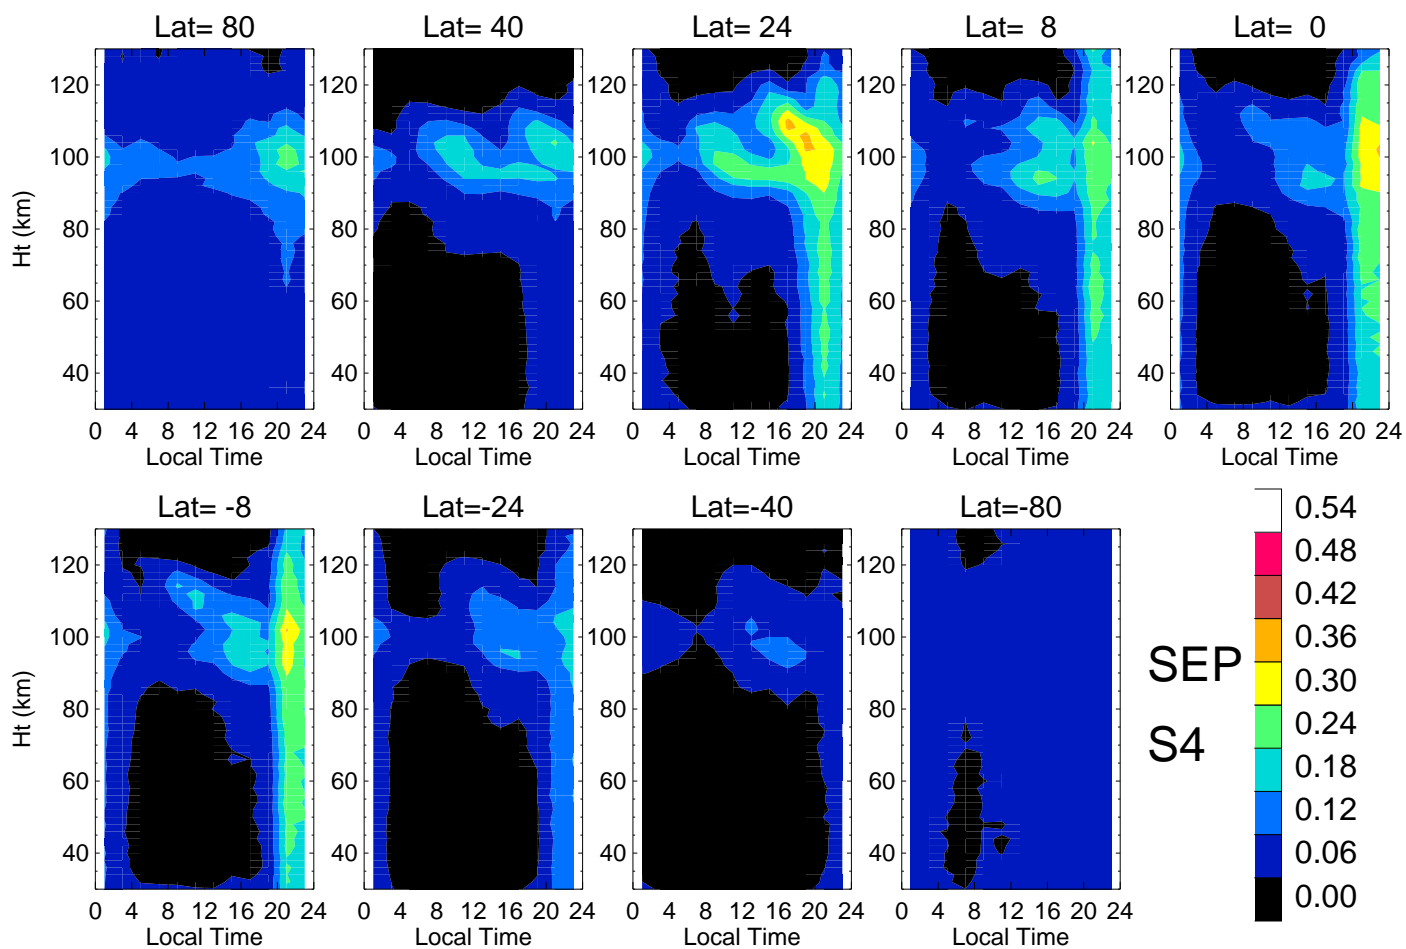

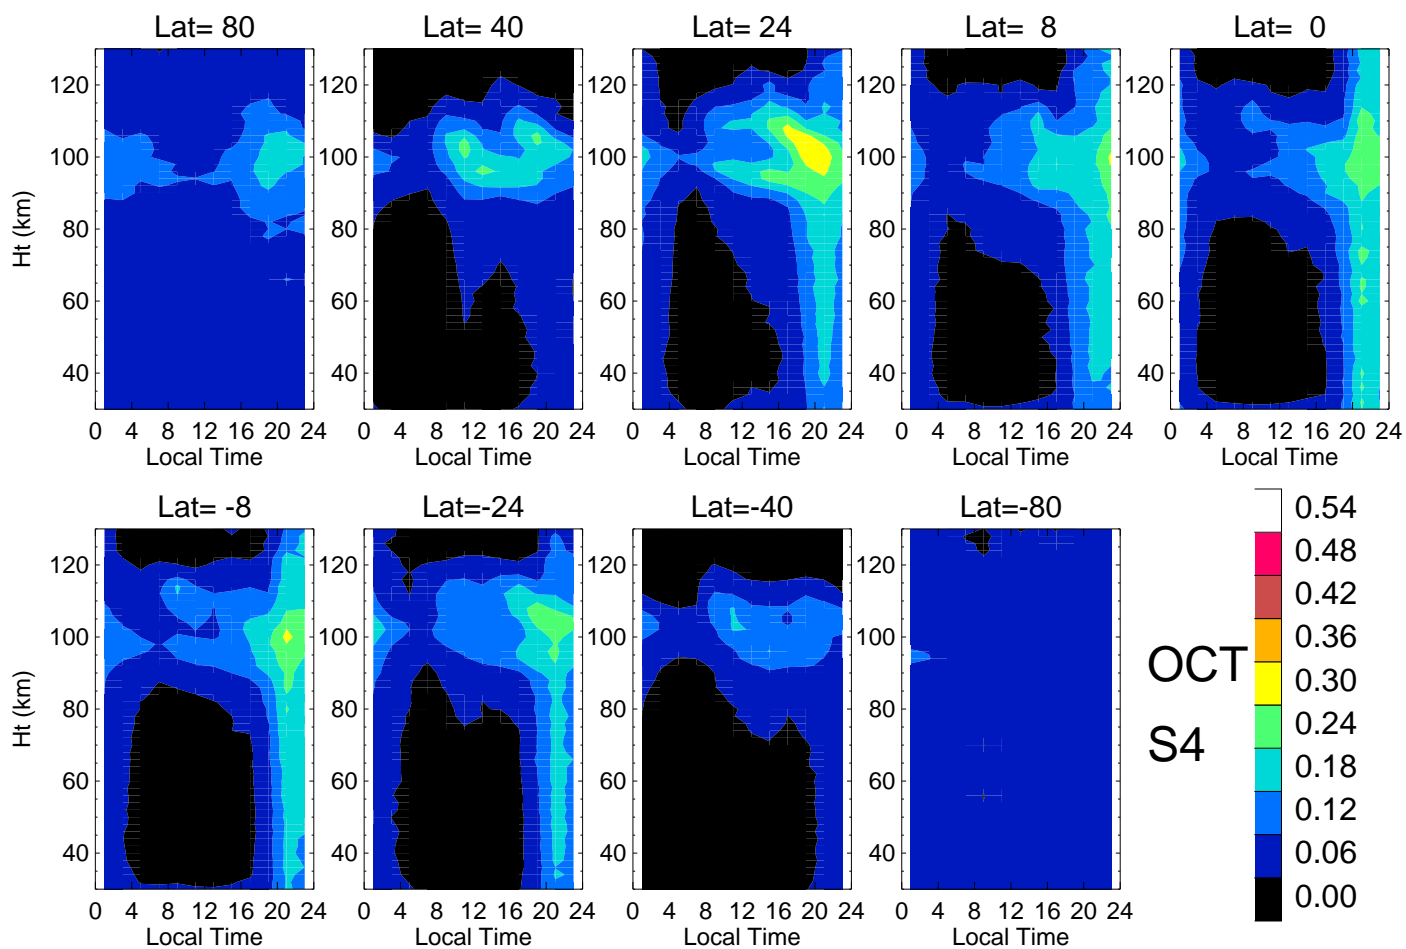

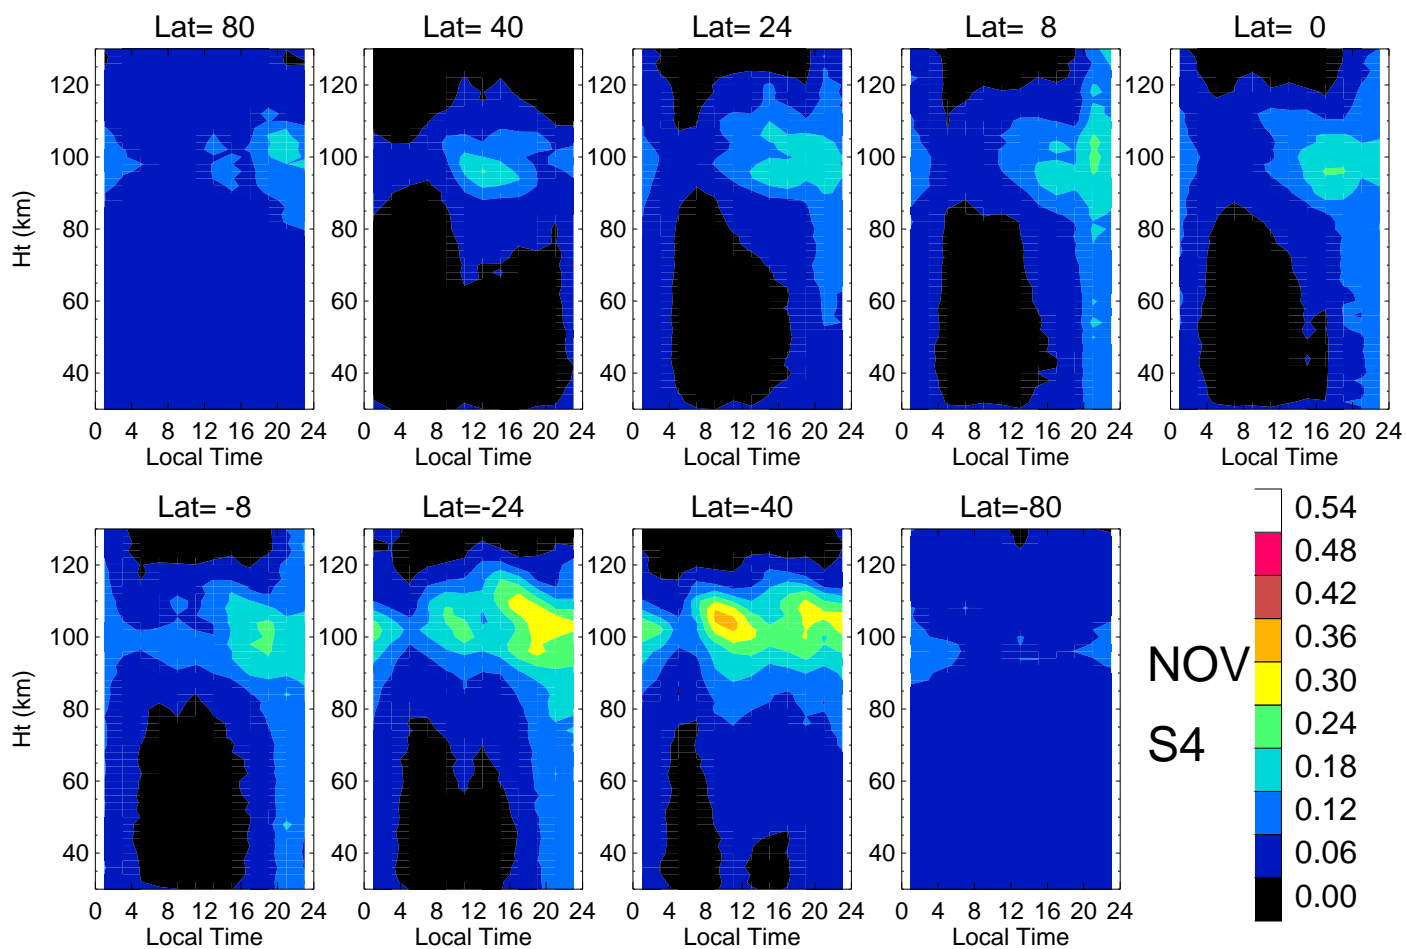

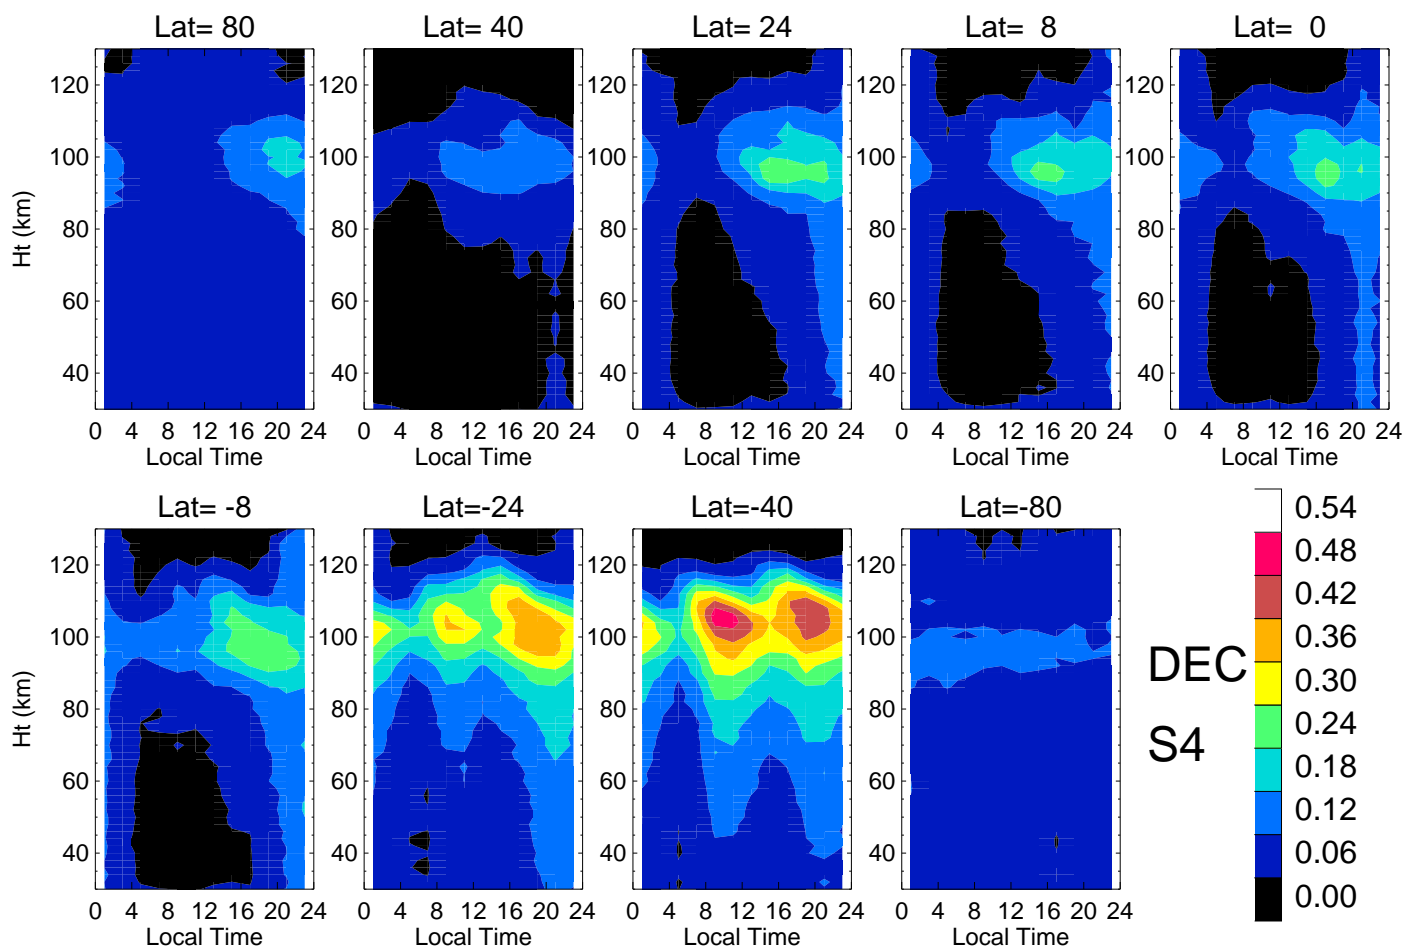

Supplement: s1 [file s1]
